1 **Title**

2 Genotype by microbiome interactions have large effects on growth in *Lotus japonicus*

3

4 **Authors**

5 Masaru Bamba<sup>1</sup>, Turgut Yigit Akyol<sup>2</sup>, Yusuke Azuma<sup>1</sup>, Johan Quilbe<sup>2</sup>, Stig Uggerhøj  
6 Andersen<sup>2</sup>, Shusei Sato<sup>1</sup>

7

8 **Affiliations and Addresses**

9 <sup>1</sup> Graduate School of Life Sciences, Tohoku University, 2-1-1 Katahira, Aoba, Sendai  
10 980-8577, Japan

11 <sup>2</sup> Department of Molecular Biology and Genetics, Aarhus University, 8000 Aarhus C,  
12 Denmark

13

14 **Corresponding authors**

15 Masaru Bamba: masaru.bamba.b2@tohoku.ac.jp

16 Shusei Sato: shusei.sato.c1@tohoku.ac.jp

17

18 **Short running head**

19 Genotype by microbiome interaction on plant growth

20

21 **Abstract**

22 Biological interactions between plants and their root microbiomes are pivotal for plant  
23 growth. Even though the plant genotype [G], soil microbiome [C], and growth  
24 conditions (environment) [E] are core factors shaping the root microbiome, their  
25 relationships remain unclear. We disentangled the effects of G, C, E, and their  
26 interactions on the *Lotus* root microbiome and plant growth using a cross-inoculation  
27 approach that reconstructed the interactions between nine *Lotus* accessions and four soil  
28 microbiomes under two different environmental conditions. We found that a large  
29 proportion of the root microbiome composition was determined by C and E and that G-  
30 related (G, G × C, and G × E) effects were significant but small. In contrast, the  
31 interactions between G and C had a more pronounced effect on plant shoot growth than  
32 C alone. Our findings indicate that most microbiome variations controlled by C have

33 little effect on the plant phenotype, whereas  $G \times C$  interactions have more significant  
34 effects. Plant genotype-dependent interactions with soil microbes warrant more  
35 attention in efforts to optimize crop yield and resilience.

36

37 **Keywords**

38 Plant-microbiome interaction, Root microbiome, *Lotus japonicus*, Cross-inoculation experiment

39

## 40 **Introduction**

41 The interaction between the microbiome and plant roots is one of the most influential  
42 factors affecting plant growth. This interaction is pervasive and can have an extensive  
43 effect on host plants, such as disease resistance (Santhanam et al., 2015; Busby et al.,  
44 2016; Carrion et al., 2019), stress tolerance (de Vries et al., 2019; Liu et al., 2020),  
45 nutrient supply (Zhang et al., 2019), and overall plant health (Berendsen et al., 2012).  
46 Consequently, there has been increasing interest in clarifying how plant-microbiome  
47 interactions are established, maintained, and exploited in agronomy and ecology  
48 (Mauchline and Malone, 2017). The root microbiome structure results from complex  
49 interactions among host plants, soil microbiome, and abiotic environments. A plant  
50 recruits bacteria from the soil microbiome to its root/rhizosphere and establishes its root  
51 microbiome, which deviates considerably from the soil microbiome in a particular  
52 environment; consequently, the root microbiome responds to changes in plant status.  
53 For this reason, there is a need to disentangle the interactions among the effects of  
54 plants, soil microbiome, and environment to understand the dynamics and function of  
55 the root microbiome.

56 Plant genetic differentiation is one of the most studied plant factors that affect  
57 root microbiome structure (Bamba et al., 2019). *Arabidopsis thaliana* host genotypes  
58 have a small but significant influence on the microbes inhabiting the endophyte  
59 compartment of their roots (Bulgarelli et al., 2012; Lundberg et al., 2012). Similar  
60 patterns have been observed in *Medicago truncatula* (Brown et al., 2020), tomato  
61 (Weinert et al., 2011), and inbred maize lines (Peiffer et al., 2013; Walters et al., 2018).  
62 In the interspecies-level comparisons, the phylogenetic distance between plants and root  
63 microbiome dissimilarity appeared to be correlated in Brassicaceae, Poaceae (Bouffaud  
64 et al., 2014; Schlaeppi et al., 2014; Terrazas et al., 2020) and higher taxonomic levels  
65 (Wang and Sugiyama, 2020), supporting the effects of host genetics on the root  
66 microbiome. In contrast, the host genotypes of *Boechera stricta* in field experiments did  
67 not show statistically significant effects on their root microbiome structures (Wagner et  
68 al., 2016) because of low genetic divergence caused for thousands of years (Rushworth  
69 et al., 2011). According to these studies, plant genetic differentiation could drive the  
70 divergent host genotype effects on the root microbiome.

71 The response of plants to different environments also alters their root

72 microbiome (Bouskill et al., 2013), and its impact depends on the plant genotype.  
73 Lundberg et al. (2012) concluded that the plant genotype was less important for the root  
74 microbiome structures than the soil type containing differences in the microbiome and  
75 environment. In contrast, their genotype-dependent effects were also observed  
76 (Lundberg et al., 2012). A recent pot experiment showed that the effect of  
77 environmental treatment on the root microbiome (both fungal and bacterial  
78 communities) varied among plant genotypes (Gallart et al., 2018). Environmental  
79 treatments can also alter the microbiomes in the soil, rhizosphere, and root endophytes  
80 (Naylor et al., 2017; Yeoh et al., 2016). Accordingly, plant genotype effects on the root  
81 microbiome could exist in a complex entanglement with the environment and soil  
82 microbiome. However, it remains unclear how the plant genotype [G], soil microbiome  
83 [C], and soil environment [E] relate to each other in shaping the plant root microbiome  
84 and its impact on plant phenotypes.

85 Here, to disentangle the effects of G, C, E, and their interactions on plant root  
86 microbiome and plant phenotypic variation, we reconstructed their interactions using  
87 nine *Lotus* accessions and four soil microbiomes under two different environmental  
88 conditions. *Lotus japonicus* is a model species for understanding plant-microbe  
89 interactions (Handberg and Stougaard, 1992; Kawaguchi, 2000; Bamba et al., 2019,  
90 2020). The Japanese population has originated and experienced recent population  
91 expansion in the Japanese archipelago during the last approximately 20 thousand years  
92 (Shah et al., 2020). We chose eight different accessions and one closely related species,  
93 *Lotus burttii*, as host plants based on their population genomic information. For the soil  
94 microbiome, we focused on two bacterial communities extracted from the soils of the  
95 Kashimadai field at Tohoku University, Japan. Each of them alone, a 1:1 mixture and a  
96 non-inoculant control, were used in this study. The soils were obtained from two  
97 adjacent plots (F5C and F5S) and irrigated using underground water containing ~1/4 the  
98 salt concentration of seawater to F5S and regular water to F5C from 2017 to 2019.  
99 These inoculation experiments were performed in environments with and without salt,  
100 corresponding to the environment in which the soil microbial community was sampled.

101 In the present study, we performed 16S rRNA amplicon sequencing using  
102 MAUI-seq technologies (Fields et al., 2020) and conducted community analyses. We  
103 aimed to quantify the effects of G, C, and E on root microbiomes and identify which

104 microbes are sensitive to plant genotypes. Second, we compared plant terminal  
105 phenotypes in the cross-inoculation experiments to quantify these effects on plant  
106 growth.

## 107 **Results**

108 We performed a cross-inoculation experiment using nine *Lotus* accessions [G] and four  
109 inoculants [C] under two conditions [E], resulting in 72 combinations. We collected 768  
110 plant individuals (6–12 per combination) (Supplemental Table S1). Although we  
111 cultivated 12 plants for each combination, approximately 9% of plants did not survive.

112

### 113 **Plant root microbiomes and effects of G, C, and E**

114 We investigated the root microbiomes of 327 plants. Using MiSeq sequencing, we  
115 obtained 168,097,504 reads (ranging from 100,220 to 830,796 per individual). After  
116 pre-processing, 115,530,212 reads were allocated to 327 individuals, ranging from  
117 55,512 to 795,588. We used all quality-filtered reads for counting Unique Molecular  
118 Identifiers (UMI). In addition, 38,813 unique sequences, with an average number of  
119 UMIs greater than or equal to 0.1, were used for the BLAST search. As a result of the  
120 BLAST search, 35,370 sequences consisting of 16,785,973 reads were derived from the  
121 bacterial 16S rRNA genes. Bacterial sequences were assigned to 4,225 different  
122 bacterial strains, 230 genera, and 70 families (Figure 1).

123 Prior to diversity analysis, we performed coverage-based rarefaction to remove  
124 bias caused by the different numbers of sequenced reads among samples using the  
125 aggregated data based on the BLAST top hit strain. Because the lowest slope at the end  
126 of the rarefaction curve among the samples was 0.0270, we resampled all samples so  
127 that their slope at the end of the rarefaction curve was equal to that value. (Supplemental  
128 Figure S1).

129 We calculated the  $\alpha$ -diversities of the *Lotus* root microbiome, using the Shannon  
130 index based on the rarefied composition data, and they ranged from 2.789 to 7.230  
131 (Figure 2). We detected a significant effect of G and C on the  $\alpha$ -diversity while their  
132 interaction and the environment had no effect ( $P < 0.05$ , Supplemental Table S2). The  
133 Tukey-Kramer test indicated that the root microbiomes of MG20 were more diverse  
134 than those of Gifu and MG68, and the microbiomes with MIX were more diverse than  
135 those with F5C inoculants ( $P < 0.05$ , Supplemental Table S3).

136 The community structures of the root microbiomes were characterized based on  
137 the-  $\beta$  diversity (Morisita-Horn index). Non-metric multidimensional scaling (nMDS)  
138 analysis showed an apparent difference between environments [E] and among

139 inoculants [C], whereas the differences between hosts [G] were unclear (Figure 3). The  
140 PERMANOVA analysis indicated that G, C, E, and their interactions significantly  
141 affected the root microbiome structure ( $P < 0.05$ , Table 1). The effects of C and E were  
142 the largest, explaining about 22% of the variance. The others ( G,  $G \times C$ ,  $G \times E$ ,  $C \times E$ ,  
143 and  $G \times C \times E$ ) were around 4%, and 35% of the variance was residual. This result was  
144 comparable to the community structure of the root microbial community within *L.*  
145 *japonicus* species (Supplemental Table S4), indicating that the root microbiome of *L.*  
146 *burttii* accession did not deviate from that of *L. japonicus*. Evaluating the G effect in  
147 conditions where the combination of C and E was fixed showed that the differences in  
148 G could explain approximately 25-40% of the variation in microbiome composition  
149 (Supplemental Table S5). In addition, the differences in the root microbiome among  
150 host plants were not correlated with the genetic distances between host accessions ( $P >$   
151  $0.05$ , Supplemental Figure S2; Supplemental Table S6).

152 To identify which bacterial strains were affected by G, C, and E, we evaluated  
153 these effects using a generalized linear model (GLM), in which the response variable  
154 was each bacterial frequency. Of the 3,700 strains, 3,333 were significantly affected by  
155 any G, C, and E variable and their interactions. The G variable had a significant effect  
156 on 1221 of these strains; however, 2485 and 2634 strains were affected by C and E,  
157 respectively (Supplemental Table S7; Supplemental Figure S3). The strains affected by  
158 G, C, and E were shared by G versus C (33%), G versus E (32%), and C versus E (57%)  
159 (Supplemental Figure S4A). The variables containing G (G,  $G \times C$ ,  $G \times E$ , and  $G \times C \times$   
160 E) had significant effects on 1,928 strains, and the strains were shared by G vs.  $G \times C$   
161 (38%), G vs.  $G \times E$  (52%), and G vs.  $G \times C \times E$  (34%) (Supplemental Figure S4B).  
162 Moreover, the enriched genera that were significantly affected by the variables  
163 containing G were *Pseudomonas*, *Sphingobium*, *Ralstonia*, and *Delftia* (Fisher's exact  
164 test  $FDR-P < 0.05$ , Supplemental Table S8). Similarly, the enriched families affected by  
165 the same variables were Enterobacteriaceae, Sphingomonadaceae, Pseudomonadaceae,  
166 Burkholderiaceae, and Methylophilaceae (Fisher's exact test  $FDR-P < 0.05$ ,  
167 Supplemental Table S8).

168

169 **Plant phenotype and effects of G, C, E.**

170 We obtained four phenotypes (shoot length, SL; root length, RL; number of leaves,  
171 NOL; and number of branches, NOB) from all 749 individuals (Figure 4). All  
172 phenotypic traits were positively correlated (Pearson's product-moment correlation:  $P <$   
173  $0.001$ , Supplemental Figure S5). All combinations of phenotypic traits, except for those  
174 between RL and NOB, were significantly correlated in the G, C, and E groups  
175 (Pearson's product-moment correlation:  $P < 0.05$ , Supplemental Figures S5, S6, and S7).

176 In the cross-inoculation experiment, we detected significant effects of G, C, and  
177 E and their interactions on all four phenotypes with GLM, except for  $C \times E$  on SL and  
178 NOB (F test  $P < 0.05$ , Supplemental Table S9; Supplemental Figure S8). The most  
179 prominent effects on all phenotypes were  $G \times C \times E$ . By contrast, the other effect sizes  
180 of each variable in the GLM varied by phenotype: the G effect was the largest on SL  
181 and RL, and the E effect was the largest on NOL and NOB (Supplemental Table S9).  
182 The coefficients of salt addition, as an E factor, were positive for plant shoot  
183 phenotypes, and the Tukey-Kramer test indicated significant differences between salt  
184 and non-salt conditions ( $P < 0.001$ , Supplemental Table S10) for all phenotypes; that is,  
185 NaCl in the growth media promoted plant growth. The C coefficients for F5C, MIX,  
186 and F5S in the GLM were mostly negative, except for F5C in RL. The Tukey-Kramer  
187 test showed significant differences between non-inoculant and inoculant conditions ( $P <$   
188  $0.001$ , Supplemental Table S10). This result indicates that the microbiomes in the  
189 Tohoku fields had adverse effects on plant growth.

190 The GLM without non-inoculant data showed that all G, C, and E cases and  
191 their interactions significantly affected all four plant phenotypes, except for  $C \times E$  on  
192 RL (Table 2; Supplemental Figure S9). The largest effect size for all the plant  
193 phenotypes in the model was  $G \times C \times E$ . The second-largest effect on SL, RL, and NOL  
194 was on G, while that on NOB was on E. The C variables showed that the differences in  
195 inoculant communities in this model had a less significant effect on plant phenotypes  
196 (Figure 5). The  $\eta^2$  of variable C ranged from 0.003 to 0.03, which is less than or equal  
197 to "small" by Cohen 1998's guideline. The  $\eta^2$  of variable  $G \times C$  was between 0.025 and  
198 0.031, which is assigned to "small". These  $\eta^2$  values of  $G \times C$  variables were larger than  
199 those of C variables for all phenotypes, indicating that  $G \times C$  variables were more  
200 significant than C.



201           In this study, the potential confounding factors derived from each pot could have  
202 caused an overestimation of  $G \times C \times E$  effects because the pot differences masked all  $G$   
203  $\times C \times E$  combinations. First, we calculated how much variation in plant phenotypes was  
204 explained by the differences in pots for each  $G \times C \times E$  combination. On average, 15%  
205 and 8% of the variance in SL and RL, respectively, were derived between pot replicates,  
206 indicating that variation existed between them. To consider this variance in the analysis,  
207 we randomly selected one of the pots from each combination and evaluated the effects  
208 of  $G$ ,  $C$ ,  $E$ , and their interactions on plant phenotypes. Although we could not  
209 distinguish the  $G \times C \times E$  effects from pot effects during the permutations, the other  
210 effects could be estimated by considering the variability derived from pot effects. The  
211 statistical significance represented by  $P$  values of  $G$ ,  $C$ ,  $E$ ,  $G \times C$ , and  $G \times E$  effects  
212 were mostly distributed below 0.05; on the other hand, the  $P$  values of  $C \times E$  effects on  
213 plant phenotypes, except for RL, were skewed distributed above 0.05 (Supplemental  
214 Figure S10).

215           Moreover, for SL, RL, and NOL, the effects of the  $G$  variable were the largest  
216 and those of the  $E$  variable were the largest for NOB. The differences in the inoculant  
217 communities had smaller effects on all phenotypes than the interactions between the  $G$   
218 and  $C$  variables (Supplemental Figure S11). Because these results were comparable to  
219 the results of GLM with a complete dataset, the estimation of the effects of  $G$ ,  $C$ , and  $E$ ,  
220 and their interactions are likely to be meaningful, even if pot effects are present.

221           Since both plant phenotypes and microbial communities depend on the effects of  
222  $G$ ,  $C$ ,  $E$ , and their interactions, we attempted to integrate the variation in SL and root  
223 microbiome structure with variance component analysis. We used standardized SL  
224 values by the  $G$  factor to calculate SL variation because this factor explained a large  
225 amount of SL and little root microbiome structure. Variation in the root microbiome  
226 structure was calculated based on  $1 -$  the Morisita-Horn similarity index matrix, an  
227 identical matrix used in the community analysis. In this analysis, 55% of the variance in  
228 SL could be explained by the similarity of root microbiome structures. This result  
229 indicated that identifying which microbes could affect plant growth was difficult, even  
230 though many kinds of microbes in the soil microbiome would have favorable or adverse  
231 effects on plant phenotypes.

232

233 **Discussion**

234 While there have been several attempts to evaluate the individual effects of plant  
235 genotype [G], inoculant community [C], and growth condition [E], studies comparing  
236 these effects and their interactions on the plant root microbiome and phenotypes have  
237 been uncommon. Here, we performed cross-inoculation experiments using nine *Lotus*  
238 accessions and four inoculant microbial communities under two conditions and  
239 characterized plant phenotypes and root microbiomes. The cross-inoculation  
240 experiments were conducted in controlled environments and enabled us to disentangle  
241 the effects of G, C, and E, and their interactions on the *Lotus* root microbiome and  
242 phenotypes.

243 In the cross-inoculation experiments, the microbiome detected in plant roots had  
244 the features of a root/rhizosphere microbial community. The largest proportion of the  
245 microbial community was Proteobacteria, followed by Bacteroidetes and Firmicutes,  
246 with these three Phylums accounting for approximately 90% of the community (Figure  
247 1; Supplemental Table S11). Proteobacteria is one of the most enriched phyla in the  
248 plant rhizosphere compared with the soil microbiome (Peiffer et al., 2013). Firmicutes  
249 and Bacteroidetes are the predominant phyla in the root microbiome (Guo et al., 2017;  
250 Enebe and Babalola, 2020). Consequently, we identified the microbiome that inhabited  
251 the *Lotus* root and rhizosphere in this study.

252 Meanwhile, our analysis detected few Actinobacteria commonly observed in the  
253 rhizosphere (Yadav et al., 2018). Actinobacteria were observed in the plant roots during  
254 our preliminary experiment, in which *Lotus* was grown directly at the site where we  
255 collected the inoculated community used in this study (Bamba unpublished; data not  
256 shown). The small number of Actinobacteria may be explained by our inoculation  
257 methods. The growth pots were filled with vermiculite and media and kept anaerobic,  
258 and these conditions are unfavorable for most Actinobacteria that are aerobic (Trujillo,  
259 2016). Therefore, we should note that our cross-inoculation experiment did not reflect  
260 the complete relationship between the plant and soil bacterial communities.

261 The microbial communities used in this study reflected the unique features of  
262 our experimental field (F5C and F5S in the Kashimadai field). First, we found that all  
263 the microbial communities used in this study had adverse effects on *Lotus* growth  
264 (Supplemental Table S10). This result suggests that the soil microbial communities in

265 the Kashimadai fields had enriched pathogenic microbes during three years of *Lotus*  
266 *japonicus* cultivation (Shah et al., 2020), a potential growing disorder by continuous  
267 cropping (Santhanam et al., 2015). Second, according to the differences in root  
268 microbiomes among C treatments (Figure 3), irrigation using underground water  
269 containing salt in the F5S fields could change soil microbial communities in that field.  
270 The higher  $\alpha$ -diversity of MIX and MIX locations intermediate from F5C to F5S in  $\beta$ -  
271 diversity could confirm the microbiome differences between the soils from F5C and  
272 F5S (Figures 2 and 3; Supplemental Figure S3). In addition, many microbes depended  
273 on both C and E effects (Supplemental Figure S4), suggesting that salt treatment  
274 changed the soil microbiome in F5S from the original microbiome, which did not differ  
275 between F5C and F5S. Therefore, the present study could reproduce the combination of  
276 the microbial community that changed with the environment and the environmental  
277 conditions that contributed to the change.

278 We found that the host genotype [G] significantly affected the  $\alpha$ - and  $\beta$ -diversity  
279 of root microbiomes; nevertheless, the effect size was smaller than that of the C and E  
280 factors (Table 1). While previous studies have commonly shown a low contribution of  
281 host genotypes to shaping their root microbiome structures (Lundberg et al., 2012;  
282 Peiffer et al., 2013), assessing the impact compared to C and E is uncommon. In this  
283 study, even if a C- or E-dependent host effect existed, the sum of genotype-related  
284 effects on the root microbiome (17%) was smaller than the sole effect of the  
285 encountered community [C] (21%) and growth environment [E] (22%). This result  
286 indicates that many variations in root microbiomes could be defined by the microbial  
287 communities and growth environments encountered. In addition, 1776, 876, and 685 out  
288 of 3700 microbial strains were independent of the G-related (G, G  $\times$  C, G  $\times$  E, and G  $\times$   
289 C  $\times$  E), C-related (C, G  $\times$  C, C  $\times$  E, and G  $\times$  C  $\times$  E), and E-related (E, G  $\times$  E, C  $\times$  E, and  
290 G  $\times$  C  $\times$  E) effects, respectively. These results indicate that many microbes that  
291 constitute the root microbiome were unaffected by host differences.

292 Furthermore, when the C and E were fixed, the 25-40% variation in microbial  
293 communities could be explained by G, and these effects were higher in salt conditions  
294 than in non-salt (Supplemental Figure S12A-F; Supplemental Table S5). This finding  
295 suggests that G effects could be growth conditions dependent. Therefore, small but  
296 significant host genotype effects on root microbiome suggested that the interaction with

297 specific microbes could be controlled by the variable genetic basis of *Lotus* accessions  
298 depending on the growing conditions.

299 We observed a few microbial taxa, including *Pseudomonas*, *Sphingobium*,  
300 *Ralstonia*, and *Delftia*, which were sensitive to differences in plant genotypes. This  
301 finding is not surprising since the bacteria belonging to these genera have been reported  
302 as plant-interacting bacteria (Vishwakarma et al., 2020; Pfeiffer et al., 2017; Wozniak et  
303 al., 2019). The genus *Pseudomonas* is ubiquitous in diverse ecological habitats and  
304 encompasses plant symbionts and pathogens (Jain and Das, 2016). *Sphingobium* was  
305 highly abundant in the rhizosphere of maize and has been reported to show disease  
306 suppression ability for *Arabidopsis* (Innerebner et al., 2011). On the other hand,  
307 *Ralstonia* and *Delftia* bacteria were enriched as sensitive microbes to the interaction  
308 effects among G, C, and E. *Ralstonia* is a significant plant pathogen (Alvarez et al.,  
309 2019). In addition, several strains belonging to *Delftia* have been reported as plant  
310 growth-promoting rhizobacteria (Suchan et al., 2020). Bacteria under the direct  
311 influence of G factors were enriched in *Pseudomonas* and *Sphingobium*; nevertheless,  
312 their frequency was not correlated (Supplemental Figures S13 and S14). *Ralstonia* was  
313 observed to be more frequent in salty environments but less frequent in a genotype-  
314 dependent manner. *Delftia* strains were enriched in F5C inoculants, and their  
315 frequencies were higher, particularly MG20 and Gifu, under salt conditions. These  
316 results indicate that the affected genotypes differed among bacteria from the same genus,  
317 and their impact depended on the growth environment. Furthermore, these sensitive  
318 genera were not the predominant taxa in this study (*Pseudomonas*: 0.9%, *Sphingobium*:  
319 2.5%, *Ralstonia*: 0.7%, and *Delftia*: 5.8%), supporting the low contribution to shaping  
320 microbiome structures. In this study, we found that genomic differences within plant  
321 species do not alter the structure of the root microbiome; nevertheless, there were  
322 bacteria whose interactions were under plant genotype-dependent control.

323 *Lotus*-microbe interactions depending on the plant genotypes could be more  
324 important for plant growth than the differences among encountered microbes (Table 2).  
325 The smaller effect of C on plant phenotypes, particularly plant shoot phenotypes, than  
326 that of G × C indicated that most altered microbes themselves had little effect on plant  
327 phenotypes; however, their interaction with G had more significant outcomes. These  
328 effects differed between plant shoot and root phenotypes; the root phenotype was more

329 sensitive to differences in the encountered microbiome than the shoot phenotypes. This  
330 result suggests that plant roots interacted with and responded to soil microbiomes. In  
331 contrast, their interaction effects could be buffered/facilitated by each host genotype and  
332 spread into the shoots. Meanwhile, we could underestimate the impact of different  
333 microbial communities on plant phenotypes since inoculant microbe differentiation was  
334 limited due to their specific origin. Using natural habitats will have more diverse  
335 microbes and interactions between plant genotypes and microbes and help unravel the  
336 natural C and G  $\times$  C effects on plant phenotypes.

337         There are two possible scenarios to explain why the G  $\times$  C effect occurred: one  
338 is that the bacteria that affect plant phenotypes in a genotype-dependent manner are  
339 distributed differently in each inoculant community; another is that the genotype-  
340 dependent effects of bacteria on plant phenotypes are caused by each inoculant  
341 community, even if there are no differences in bacterial existence among inoculants.  
342 Even though around 70% of bacterial strains were distributed in different inoculant  
343 communities (Supplemental Figure S4) and could support the former scenario, it is still  
344 challenging to determine which scenario each G  $\times$  C-related strain would follow. It was  
345 challenging to evaluate the effect of each bacterium on plant phenotypes because G, C,  
346 and E and their interactions affected both phenotypes and root microbiome and did not  
347 allow us to separate them. In this study, the root microbiome structure could explain  
348 55% of the variation in plant shoot length, except for variance caused by the sole G  
349 factor. Accordingly, more detailed experiments and analyses, such as inoculation  
350 studies using synthetic communities (Finkel et al., 2020), will be more efficient in  
351 clarifying which microbes can affect plant phenotypes.

352         The genetic basis underlying the effects of G and G  $\times$  C on interactions with  
353 microbes remains unclear. According to previous research, differences in plant genomes  
354 and the dissimilarity of their root microbiomes correlate with each other (Bouffaud et al.,  
355 2014; Schlaeppli et al., 2014; Terrazas et al., 2020). A higher correlation was observed at  
356 higher taxonomic levels (Wang and Sugiyama, 2020), and a lower correlation was  
357 observed for closely related species or within species levels (Terrazas et al., 2020). This  
358 finding suggests that the accumulated genomic divergence of plants may cause  
359 differentiation of the root microbiome. In contrast, there were no correlations between  
360 the kinship of *Lotus japonicus* and the root microbiome in this study (Supplemental

361 Figure S2). By focusing on the natural diversity of *Lotus japonicus*, we can elucidate  
362 the genetic basis underlying the effects of G, G × C, and G × C × E on plant phenotypes  
363 and root microbiomes. This approach would be valuable for the disentanglement of the  
364 shape and maintenance of plant-microbiome interactions in nature.

365

366

367

## 368 **Materials and Methods**

### 369 **Cross-inoculation experiments**

370 We performed a cross-inoculation experiment to quantify the effects of plant genotype  
371 [G], soil microbiomes [C], growth environment [E], and their interactions on plant  
372 phenotypes and root microbiomes. We cultivated nine *Lotus* accessions with four soil  
373 microbial treatments (three microbes and a non-microbe control) under two conditions,  
374 resulting in 72 combinations.

375 We used eight *Lotus japonicus* natural accessions (Gifu, MG11, MG20, MG46,  
376 MG56, MG63, MG67, and MG68) and one *Lotus burttii* (B-303) for the cross-  
377 inoculation experiment. Three (Gifu, MG20, and *burttii*) were chosen because of their  
378 previous use as experimental lines (Kawaguchi et al., 2001; 2005). The other accessions  
379 were selected based on their genomic relationships and were referred to as Group 1  
380 (MG67 and MG68), Group 2 (MG56 and MG63), and Group 3 (MG11 and MG46)  
381 (Shah et al., 2020). Seeds of *Lotus* accessions were obtained from the National  
382 BioResource Project in Japan.

383 Soil microbiomes were obtained from soils collected at the Kashimadai fields of  
384 Tohoku University (38.46 °N, 141.09 °E), located in northern Japan, in May 2020. Soil  
385 samples were obtained from two adjacent plots (F5C and F5S) where *Lotus japonicus*  
386 was cultivated for the last three years. Irrigation treatment was conducted using  
387 underground water containing salt at approximately 1/4 the concentration of seawater to  
388 F5S and regular water for F5C from 2017 to 2019. We separated 250 g of each soil and  
389 crushed it using a mixer with 250 mL of cold PBS buffer. Crushed soils were  
390 precipitated by centrifugation at 1000 × g for 10 min at 10 °C, and the supernatants  
391 were collected. The precipitates were returned to the mixer and crushing and  
392 centrifugation were repeated three times. The collected supernatant was filtered using  
393 Advantec 5A filter paper (collected particle size > 0.7 μm; ash content <0.01%). The  
394 filtered solutions were centrifuged at 8000 × g for 20 min at 10 °C, and the precipitates  
395 were collected. The precipitated product was diluted with 250 mL of PBS to obtain 1  
396 mL/g microbial community extract. We used microbial community extracts from F5C,  
397 F5S, and a 1:1 mixture (MIX) for cross-inoculation experiments. As the difference in  
398 OD values between the extracts from F5C and F5S was less than 2%, we did not adjust

399 their concentrations.

400 To set up the difference in the growth environment, we used two types of media  
401 for plant cultivation. Both were based on B&D medium (Broughton and Dilworth,  
402 1971), and 1 mM KNO<sub>3</sub> was added to the media to limit symbiosis with nitrogen-fixing  
403 nodule bacteria so that plant growth would not depend on them. NaCl was then added to  
404 the medium at a final concentration of 100 mM. The extracted microbial communities  
405 were added to each medium at a concentration of 1% (v/v), making eight different  
406 media (inoculants: F5C, F5S, MIX, and non-inoculant; media: SALT and non-SALT),  
407 which were used in the following experiments.

408 Partly scrubbed *Lotus* seeds were sterilized by immersion in 2% sodium  
409 hypochlorite for 3 min and rinsed three times with sterile MilliQ water. After overnight  
410 imbibition, the swollen seeds were sown on 1% agar plates, incubated in the dark for  
411 three days at 25 °C, and then grown at the same temperature under 16/8 light/dark  
412 conditions for 24 h. The rooted plants were transplanted into pots with a lid, filled with  
413 300 mL sterilized vermiculite and 250 mL media, and grown at 25 °C under the same  
414 light conditions for four weeks. The growth pots were closed with lids to prevent cross-  
415 contamination. Two pots were used for each plant-inoculant-condition combination. A  
416 total of 144 pots (nine plant accessions × four inoculants × two conditions) were  
417 simultaneously grown in a growth chamber. We arranged the 144 pots into 10 groups of  
418 14-15 pots each, and the locations of the groups were randomized weekly to prevent  
419 uneven lighting conditions. The group to which the pot belonged and the position of the  
420 pot in the group were randomly determined. Six plants were cultivated in each pot.

421 We then harvested whole plant bodies, imaged all individuals with a high-  
422 resolution scanner, and separated their roots and root nodules. Shoot length (SL),  
423 number of leaves (NOL), number of branches (NOB), and root length (RL) were  
424 measured from the scanned data as plant phenotypes. The roots were washed with  
425 sterilized distilled water, frozen in liquid nitrogen, and preserved at -80 °C until DNA  
426 extraction.

427

#### 428 **DNA extraction for Miseq sequencing**

429 Prior to DNA extraction, we cut each root sample into approximately 2 cm pieces and  
430 collected them randomly into sterilized tubes. The genomic DNA of each root sample



431 was extracted using a Qiagen MagAttract 96 DNA Plant Core Kit (QIAGEN Inc.,  
432 Valencia, CA, USA) according to the manufacturer's instructions.

433 Pair-end library preparation for MiSeq sequencing was conducted using the two-  
434 step tailed PCR method described on Illumina (Illumina, San Diego, CA, USA). We  
435 used the following primer pairs to amplify partial sequences of the 16S rRNA gene:

436 V5F\_MAUI\_799 (forward): 5'-

437 TCGTCGGCAGCGTCAGATGTGTATAAGAGACAGNNHNNNWNHHAACMG  
438 GATTAGATACCCKG-3'

439 V7R\_1192 (reverse): 5'-

440 GTCTCGTGGGCTCGGAGATGTGTATAAGAGACAGTCATCCCCACCTTCC  
441 -3'

442 The 3' end to 18 bases and 19 bases of each primer (forward and reverse, respectively)  
443 were 16S rRNA universal sequences (Chelius and Triplett 2001). The 19-30 base from  
444 the 3' end of the forward primer was the unique molecular identifier (Fields et al., 2020).  
445 The other regions were the Illumina overhang adapter sequences. The second-round  
446 PCR was performed using primer pairs with 16 unique indices: D501-D508 and A501-  
447 A508 (forward) and D701-D712 and A701-A712 (reverse) (Illumina).

448 The DNA concentration of the purified PCR products was adjusted and pooled  
449 into two different tubes, as the MiSeq run was performed in two separate runs. The  
450 samples used for the experiments are listed in Table S1. The paired-end libraries were  
451 mixed with 3% PhiX DNA spike-in control and used for sequencing on the MiSeq  
452 platform using Illumina MiSeq v.3 Reagent kit for 2 x 300 bp PE.

453

#### 454 **Data analysis for microbiome**

455 We conducted quality control for sequenced reads and paired-end read assembly using  
456 PEAR v0.9.6 (Zhang et al., 2014). The low-quality tails of each read were trimmed with  
457 a Phred score of 20 as the threshold, and trimmed reads with lengths of less than 200 bp  
458 were discarded. Then, pair-end reads with an overlap of more than 10 bp and a total  
459 length of more than 300 bp were combined. The UMI, primer, and target sequence  
460 regions of each read were identified based on the length of the sequences. The UMIs  
461 were counted without duplication, and the abundance of each sequence was determined  
462 based on the number of UMIs. Sequences with an average number of UMIs greater than

463 or equal to 0.1 for all samples were chosen and used in the following analyses. The  
464 identification and counting of UMIs were performed using Python 3 in-house scripts.

465 A BLAST search (Camacho et al., 2009) was conducted for each sequence with  
466 the database containing the RDP11 bacterial 16S rRNA sequences (Cole et al., 2014)  
467 and *Lotus japonicus* Gifu genome v1.2 (Kamal et al., 2020) to assign the sequences to  
468 microbial taxa. A part of the classification rank of RDP11 that was out of alignment was  
469 manually corrected. All taxa were compared with the List of Prokaryotic names with  
470 Standing in Nomenclature (Parte et al., 2020) to prevent misclassification, and those  
471 that did not match were marked as “NotAssigned”. For the BLAST results, multiple  
472 sequences had the highest match rate, and the one with the exact genus name or the  
473 earliest RDP ID was selected. The bacterial community composition was reconstructed  
474 by excluding sequences whose top hits were the Gifu genome from the BLAST results.

475

#### 476 **Microbial community analysis**

477 To evaluate the effects of combinations of plant genotype [G], inoculant microbes [C],  
478 growth conditions [E], and their interactions with the plant root microbiome, we  
479 performed community analyses. The following analysis was performed using data  
480 aggregated from sequences with exact BLAST top hits.

481 Prior to analysis, to reduce biases due to differences in sampling depth, we  
482 subsampled community data based on the rarefaction curve using the *rarefy* function  
483 implemented in *vegan*, R (Dixon 2003). We identified the sample with the lowest slope  
484 at the endpoint of its rarefaction curve and adjusted the number of reads so that the  
485 slope at the endpoint of the rarefaction curve in all samples matched (Chao and Jost,  
486 2012). We converted the rarefied community data into frequency data.

487 We then evaluated  $\alpha$ -diversity of each sample using the Shannon diversity  
488 index (Shannon and Weaver, 1949) and calculated the effects of G, C, and E on  
489 diversity using a generalized linear model (GLM). In the GLM,  $\alpha$ -diversity was the  
490 response variable, and the effects of G, C, and E and their interactions were explanatory  
491 variables. We chose the gamma distribution as the error distribution and log-link  
492 function for the model. Statistical significance was evaluated using the F-test. For the  
493 significant variables in the F-test ( $P < 0.05$ ), we conducted the Tukey-Kramer test to  
494 compare  $\alpha$ - diversities among all groups for that variable. We used the *vegan* packages

495 (Oksanen, 2020) to calculate diversities and used the *glm*, *Anova*, and *glht* function in R  
496 3.6.1 (R core team, 2019) to estimate the effects of G, C, E, and interactions.

497 To distinguish the root microbiome structures, we calculated  $\beta$ - diversities  
498 among samples using the Morisita-Horn index (Horn, 1966). To visualize the similarity  
499 of microbial communities, we conducted non-metric multidimensional scaling (nMDS)  
500 analysis using the *metaMDS* function in *vegan* R (Oksanen et al., 2020) with 100  
501 random parameters. We used PERMANOVA with the *adonis* function in *vegan*, R  
502 (Oksanen et al., 2020) with 99,999 permutations to evaluate which factors shape the  
503 bacterial community structure. To estimate the effects of variation within *L. japonicus*  
504 species on the root microbiome, we performed  $\beta$ -diversity analyses using the data,  
505 except for *L. burttii*. These analyses were also conducted for each inoculant-condition  
506 combination to clarify the effects of host genotype in different combinations.

507 Furthermore, we investigated the correlation between host genomes and root  
508 microbiome differences in each inoculant-condition combination using the Mantel test  
509 implemented in *ape* packages in R (Paradis and Schliep, 2019). The genetic distances of  
510 *Lotus japonicus* genomes were calculated using identical-by-state kinships based on the  
511 population genome information reported by Shah et al., (2020). The pairwise similarity  
512 distances of microbial communities were calculated using the Morisita-Horn index,  
513 which was calculated by averaging the microbial communities for each host.

514 We estimated the effects of G, C, and E and their interactions on the frequency  
515 of individual bacteria with GLM. We selected bacteria observed in more than six plant  
516 individuals for analysis to exclude excessive results from bacteria with minor  
517 distributions. In the GLM, each bacterial frequency was the response variable, and the  
518 effects of G, C, and E and their interactions were explanatory variables. We chose the  
519 gamma distribution as the error distribution and log-link function for the model.  
520 Statistical significance was evaluated using the F-test. Fisher's exact test was used to  
521 evaluate whether the significantly affected strains were distributed disproportionately in  
522 specific genera and families. The GLM, F-test, and Fisher's exact test were performed  
523 using R3.6.1.

524

## 525 **Data analysis for plant phenotypes**

526 We first generated heatmaps using the host-standardized phenotypic values, whose  
527 mean values of each host genotype were set to zero to visualize the variation in  
528 phenotypes. We estimated correlations among phenotypes using Pearson's product-  
529 moment correlation. To detect the effect of G, C, and E on the correlation among  
530 phenotypes, we performed a correlation test separately for each G, C, and E group. The  
531 heatmaps were illustrated by the *heatmap.2* program implemented in *gplots* in R3.6.1 (R  
532 Core Team, 2019). Correlation analyses were performed with the function implemented  
533 in *ggpairs* of R3.6.1 (R Core Team, 2019).

534 To analyze the effects of G, C, and E and their interactions on plant phenotypes,  
535 we used a generalized linear model (GLM). We used GLM instead of analysis of  
536 variance (ANOVA) because the distribution of phenotypic values deviated significantly  
537 from a normal distribution (Shapiro-Wilk test, P-value < 0.05 for all phenotypes). In the  
538 GLM, each phenotype was the response variable, and the effects of G, C, and E and  
539 their interactions were explanatory variables. We chose the gamma distribution as an  
540 error distribution and log link function for all phenotypes, because the distribution did  
541 not deviate from the expected distribution. We calculated the type II sums of squares for  
542 each variable, evaluated their statistical significance using F-tests, and estimated each  
543 variable's effect size ( $\eta^2$ ). In addition, we performed the Tukey-Kramer test to compare  
544 plant phenotypes among the G, C, and E groups. These analyses of variance were  
545 performed with the *Anova* function implemented in the *car* library (Fox and Weisberg,  
546 2019) and the *etaSquared* function implemented in the *lsr* library in R3.6.1 (R Core  
547 Team 2019). The Tukey-Kramer test was performed with the *glht* function implemented  
548 in the *multcomp* library in R3.6.1 (Hothorn et al., 2008). We performed the same  
549 analysis using a dataset that excluded non-inoculated individuals to evaluate the effect  
550 of differences in the inoculation community.

551 In addition, we performed the following statistical analyses to deal with the  
552 potential confounding factors caused by each pot because the individual plants in the  
553 same pot shared a unique environment. We evaluated the interclass correlation  
554 coefficients (ICC: variance between pots/all variance) of pots for each combination of  
555 inoculation tests (72 G  $\times$  C  $\times$  E combination) with the *glmer* function in R3.6.1. The  
556 ICCs were calculated with two plant phenotypes, plant shoot length, and root length,

557 owing to low variance in the other phenotypes. Even if there was bias due to the  
558 combination of pot effects, the multi-level analysis containing pot information as a  
559 random effect was unsuitable because the pot variables completely masked the  
560 combination information. We randomly selected one of the pots from each combination  
561 to exclude pot bias, then evaluated G, C, and E, and their interaction effect using the  
562 GLM model for 1,000 permutations.

563 As both plant phenotypes and microbial communities depend on the effects of G,  
564 C, E, and their interactions, we calculated the extent to which root microbiome  
565 structures explained the variance in plant shoot length. We calculated the variance  
566 component using the following equation:

$$567 \quad Y = u + e.$$

568 Y is an SL vector standardized for each host accession, and  $\varepsilon$  is an error term.  $\mu$   
569 is the similarity matrix of the root microbiome based on 1 - the Morisita-Horn similarity  
570 index matrix and the identical matrix used in the community analysis. We used the  
571 *emma* function in the R pipeline to calculate the variance component of u (Kang et al.,  
572 2008).

573

574

575

576 **Acknowledgments and Funding**

577 Wild accessions of *L. japonicus* used in this research were provided by the National  
578 BioResource Project (“Lotus/Glycine”) of the Ministry of Education, Culture, Sports,  
579 Science, and Technology, Japan. This work was supported by JSPS KAKENHI [grant  
580 number 21K14763 to MB], JP20H2884 to SS, and the InRoot project coordinated by  
581 Jens Stougaard supported by The Novo Nordisk Foundation Grant Number  
582 NNF129SA0059362, Denmark.

583

584 **Author Contributions**

585 Conceptualization, S.S and S.U.A.; Methodology, M.B. and S.S.; Investigation, M.B.  
586 and Y.A.; Analysis, M.B.; Data management, T.Y.A; Writing-Original draft, M.B. and  
587 S.S.; Writing-Review and Editing, S.S., S.U.A., and J. Q.; Supervision, S.S. and S.U.A;  
588 Funding Acquisition, M.B., S.S., and S.U.A.

589

590 **Conflict of Interest**

591 None declared.

592

593

594

595 **Reference**

596 **Alegria Terrazas R, Balbirnie-Cumming K, Morris J, Hedley PE, Russell J,**  
597 **Paterson E, Baggs EM, Fridman E, Bulgarelli D** (2020) A footprint of plant  
598 eco-geographic adaptation on the composition of the barley rhizosphere bacterial  
599 microbiota. *Sci Rep* **10**: 1–13

600 **Álvarez B, López MM, Biosca EG** (2019) Biocontrol of the Major Plant Pathogen  
601 *Ralstonia solanacearum* in Irrigation Water and Host Plants by Novel Waterborne  
602 Lytic Bacteriophages. *Front Microbiol* **10**: 1–17

603 **Bamba M, Aoki S, Kajita T, Setoguchi H, Watano Y, Sato S, Tsuchimatsu T** (2019)  
604 Exploring genetic diversity and signatures of horizontal gene transfer in nodule  
605 bacteria associated with *Lotus japonicus* in natural environments. *Mol Plant-*  
606 *Microbe Interact.* doi: 10.1094/MPMI-02-19-0039-R

607 **Bamba M, Aoki S, Kajita T, Setoguchi H, Watano Y, Sato S, Tsuchimatsu T** (2020)  
608 Massive rhizobial genomic variation associated with partner quality in *Lotus*–  
609 *Mesorhizobium* symbiosis. *FEMS Microbiol Ecol* 1–15

610 **Bamba M, Kawaguchi YW, Tsuchimatsu T** (2018) Plant adaptation and speciation  
611 studied by population genomic approaches. *Dev Growth, Differ* **61**: 12–24

612 **Berendsen RL, Pieterse CMJ, Bakker PAHM** (2012) The rhizosphere microbiome  
613 and plant health. *Trends Plant Sci* **17**: 478–486

614 **Bouffaud ML, Poirier MA, Muller D, Moëgne-Loccoz Y** (2014) Root microbiome  
615 relates to plant host evolution in maize and other Poaceae. *Environ Microbiol* **16**:  
616 2804–2814

617 **Bouskill NJ, Lim HC, Borglin S, Salve R, Wood TE, Silver WL, Brodie EL** (2013)  
618 Pre-exposure to drought increases the resistance of tropical forest soil bacterial  
619 communities to extended drought. *ISME J* **7**: 384–394

- 620 **Broughton WJ, Dilworth MJ** (1971) Control of leghaemoglobin synthesis in snake  
621 beans. *Biochem J* **125**: 1075–1080
- 622 **Brown SP, Grillo MA, Podowski JC, Heath KD** (2021) Correction to: Soil origin and  
623 plant genotype structure distinct microbiome compartments in the model legume  
624 *Medicago truncatula* (*Microbiome*, (2020), 8, 1, (139), 10.1186/s40168-020-  
625 00915-9). *Microbiome* **9**: 1–17
- 626 **Bulgarelli D, Rott M, Schlaeppi K, Ver Loren van Themaat E, Ahmadinejad N,**  
627 **Assenza F, Rauf P, Huettel B, Reinhardt R, Schmelzer E, et al** (2012)  
628 Revealing structure and assembly cues for *Arabidopsis* root-inhabiting bacterial  
629 microbiota. *Nature* **488**: 91–95
- 630 **Busby PE, Peay KG, Newcombe G** (2016) Common foliar fungi of *Populus*  
631 *trichocarpa* modify *Melampsora* rust disease severity. *New Phytol* **209**: 1681–  
632 1692
- 633 **Camacho C, Coulouris G, Avagyan V, Ma N, Papadopoulos J, Bealer K, Madden**  
634 **TL** (2009) BLAST+: Architecture and applications. *BMC Bioinformatics* **10**: 1–9
- 635 **Carrión VJ, Perez-Jaramillo J, Cordovez V, Tracanna V, De Hollander M, Ruiz-**  
636 **Buck D, Mendes LW, van Ijcken WFJ, Gomez-Exposito R, Elsayed SS, et al**  
637 (2019) Pathogen-induced activation of disease-suppressive functions in the  
638 endophytic root microbiome. *Science* (80- ) **366**: 606–612
- 639 **Chao A, Jost L** (2012) Coverage-based rarefaction and extrapolation: Standardizing  
640 samples by completeness rather than size. *Ecology* **93**: 2533–2547
- 641 **Chelius MK, Triplett EW** (2001) The diversity of archaea and bacteria in association  
642 with the roots of *Zea mays* L. *Microb Ecol* **41**: 252–263
- 643 **Cole JR, Wang Q, Fish JA, Chai B, McGarrell DM, Sun Y, Brown CT, Porras-**  
644 **Alfaro A, Kuske CR, Tiedje JM** (2014) Ribosomal Database Project: Data and  
645 tools for high throughput rRNA analysis. *Nucleic Acids Res* **42**: 633–642



- 646 **de Vries FT, Williams A, Stringer F, Willcocks R, McEwing R, Langridge H,**  
647 **Straathof AL** (2019) Changes in root-exudate-induced respiration reveal a novel  
648 mechanism through which drought affects ecosystem carbon cycling. *New Phytol*  
649 **224**: 132–145
- 650 **Enebe MC, Babalola OO** (2020) Effects of inorganic and organic treatments on the  
651 microbial community of maize rhizosphere by a shotgun metagenomics approach.  
652 *Ann Microbiol.* doi: 10.1186/s13213-020-01591-8
- 653 **Fields B, Moeskjær S, Friman VP, Andersen SU, Young JPW** (2021) MAUI-seq:  
654 Metabarcoding using amplicons with unique molecular identifiers to improve error  
655 correction. *Mol Ecol Resour* **21**: 703–720
- 656 **Finkel OM, Castrillo G, Herrera Paredes S, Salas González I, Dangl JL** (2017)  
657 Understanding and exploiting plant beneficial microbes. *Curr Opin Plant Biol* **38**:  
658 155–163
- 659 **Fox J, Weisberg S** (2019) *An R Companion to Applied Regression*, Third edit. Sage,  
660 Thousand Oaks
- 661 **Gallart M, Adair KL, Love J, Meason DF, Clinton PW, Xue J, Turnbull MH**  
662 (2018) Host Genotype and Nitrogen Form Shape the Root Microbiome of *Pinus*  
663 *radiata*. *Microb Ecol* **75**: 419–433
- 664 **Guo J, Ni BJ, Han X, Chen X, Bond P, Peng Y, Yuan Z** (2017) Unraveling microbial  
665 structure and diversity of activated sludge in a full-scale simultaneous nitrogen and  
666 phosphorus removal plant using metagenomic sequencing. *Enzyme Microb*  
667 *Technol* **102**: 16–25
- 668 **Handberg K, Stougaard J** (1992) *Lotus japonicus*, an autogamous, diploid legume  
669 species for classical and molecular genetics. *Plant J* **2**: 487–496

- 670 **Horn HS** (1966) Measurement of "Overlap" in Comparative Ecological Studies. The  
671 University of Chicago Press for The American Society of Naturalists.  
672 <http://www.jstor.com/stable/2459242> ECOLOGICAL STUDIES. **100**: 419–424
- 673 **Hothorn T, Bretz F, Westfall P** (2008) Simultaneous inference in general parametric  
674 models. *Biometrical J* **50**: 346–363
- 675 **Innerebner G, Knief C, Vorholt JA** (2011) Protection of *Arabidopsis thaliana* against  
676 leaf-pathogenic *Pseudomonas syringae* by *Sphingomonas* strains in a controlled  
677 model system. *Appl Environ Microbiol* **77**: 3202–3210
- 678 **Jain A, Das S** (2016) Insight into the Interaction between Plants and Associated  
679 Fluorescent *Pseudomonas* spp. *Int J Agron*. doi: 10.1155/2016/4269010
- 680 **Kamal N, Mun T, Reid D, Lin JS, Akyol TY, Sandal N, Asp T, Hirakawa H,**  
681 **Stougaard J, Mayer KFX, et al** (2020) Insights into the evolution of symbiosis  
682 gene copy number and distribution from a chromosome-scale *Lotus japonicus* Gifu  
683 genome sequence. *DNA Res* **27**: 1–10
- 684 **Kawaguchi M** (2000) *Lotus japonicus* “Miyakojima” MG-20: An early-flowering  
685 accession suitable for indoor handling. *J Plant Res* **113**: 507–509
- 686 **Kawaguchi M, Pedrosa-Harand A, Yano K, Hayashi M, Murooka Y, Saito K,**  
687 **Nagata T, Namai K, Nishida H, Shibata D, et al** (2005) *Lotus burttii* takes a  
688 position of the third corner in the *Lotus* molecular genetics triangle. *DNA Res* **12**:  
689 69–77
- 690 **Liu H, Brettell LE, Qiu Z, Singh BK** (2020) Microbiome-Mediated Stress Resistance  
691 in Plants. *Trends Plant Sci* **25**: 733–743
- 692 **Lundberg DS, Lebeis SL, Paredes SH, Yourstone S, Gehring J, Malfatti S,**  
693 **Tremblay J, Engelbrektson A, Kunin V, Rio TG Del, et al** (2012) Defining the  
694 core *Arabidopsis thaliana* root microbiome. *Nature* **488**: 86–90

- 695 **Mauchline TH, Malone JG** (2017) Life in earth – the root microbiome to the rescue?  
696 *Curr Opin Microbiol* **37**: 23–28
- 697 **Naylor D, Degraaf S, Purdom E, Coleman-Derr D** (2017) Drought and host selection  
698 influence bacterial community dynamics in the grass root microbiome. *ISME J* **11**:  
699 2691–2704
- 700 **Oksanen J, Blanchet FG, Friendly M, Kindt R, Legendre P, McGlinn D, Minchin**  
701 **PR, O’Hara RB, Simpson GL, Solymos P, et al** *Vegan: Community Ecology*  
702 *Package*. Version 2.5- 7. <https://cran.r-project.org/web/packages/vegan/index.html>
- 703 **Paradis E, Schliep K** (2019) Ape 5.0: An environment for modern phylogenetics and  
704 evolutionary analyses in R. *Bioinformatics* **35**: 526–528
- 705 **Parte AC, Carbasse JS, Meier-Kolthoff JP, Reimer LC, Göker M** (2020) List of  
706 prokaryotic names with standing in nomenclature (LPSN) moves to the DSMZ. *Int*  
707 *J Syst Evol Microbiol* **70**: 5607–5612
- 708 **Peiffer JA, Spor A, Koren O, Jin Z, Tringe SG, Dangl JL, Buckler ES, Ley RE**  
709 (2013) Diversity and heritability of the maize rhizosphere microbiome under field  
710 conditions. *Proc Natl Acad Sci* **110**: 6548–6553
- 711 **Pfeiffer S, Mitter B, Oswald A, Schloter-Hai B, Schloter M, Declerck S, Sessitsch A**  
712 (2017) Rhizosphere microbiomes of potato cultivated in the high andes show stable  
713 and dynamic core microbiomes with different responses to plant development.  
714 *FEMS Microbiol Ecol* **93**: 1–12
- 715 **Rushworth CA, Song BH, Lee CR, Mitchell-Olds T** (2011) *Boechera*, a model  
716 system for ecological genomics. *Mol Ecol* **20**: 4843–4857
- 717 **Santhanam R, Luu VT, Weinhold A, Goldberg J, Oh Y, Baldwin IT** (2015) Native  
718 root-associated bacteria rescue a plant from a sudden-wilt disease that emerged  
719 during continuous cropping. *Proc Natl Acad Sci U S A* **112**: E5013–E5120

- 720 **Schlaeppli K, Dombrowski N, Oter RG, Ver Loren Van Themaat E, Schulze-Lefert**  
721 **P** (2014) Quantitative divergence of the bacterial root microbiota in *Arabidopsis*  
722 *thaliana* relatives. *Proc Natl Acad Sci U S A* **111**: 585–592
- 723 **Shah N, Wakabayashi T, Kawamura Y, Skovbjerg CK, Wang M-Z, Mustamin Y,**  
724 **Isomura Y, Gupta V, Jin H, Mun T, et al** (2020) Extreme genetic signatures of  
725 local adaptation during *Lotus japonicus* colonization. *Nat Commun.* doi:  
726 10.1038/s41467-019-14213-y |
- 727 **Shannon, C.E., Weaver W** (1949) The mathematical theory of communication. Univ.  
728 Illinois Press 29:
- 729 **Suchan DM, Bergsveinson J, Manzon L, Pierce A, Kryachko Y, Korber D, Tan Y,**  
730 **Tambalo DD, Khan NH, Whiting M, et al** (2020) Transcriptomics reveal core  
731 activities of the plant growthpromoting bacterium *delftia acidovorans* RAY209  
732 during interaction with canola and soybean roots. *Microb Genomics* **6**: 1–13
- 733 **Team RC** (2019) R: A language and environment for statistical computing.
- 734 **Trujillo ME** (2016) Actinobacteria. eLS. doi: 10.1002/9780470015902.a0020366.pub2
- 735 **Vishwakarma K, Kumar N, Shandilya C, Mohapatra S, Bhayana S, Varma A**  
736 (2020) Revisiting Plant–Microbe Interactions and Microbial Consortia Application  
737 for Enhancing Sustainable Agriculture: A Review. *Front Microbiol* **11**: 1–21
- 738 **Wagner MR, Lundberg DS, Del Rio TG, Tringe SG, Dangl JL, Mitchell-Olds T**  
739 (2016) Host genotype and age shape the leaf and root microbiomes of a wild  
740 perennial plant. *Nat Commun* **7**: 1–15
- 741 **Walters WA, Jin Z, Youngblut N, Wallace JG, Sutter J, Zhang W, González-Peña**  
742 **A, Peiffer J, Koren O, Shi Q, et al** (2018) Large-scale replicated field study of  
743 maize rhizosphere identifies heritable microbes. *Proc Natl Acad Sci* **115**: 7368–  
744 7373

- 745 **Wang B, Sugiyama S** (2020) Phylogenetic signal of host plants in the bacterial and  
746 fungal root microbiomes of cultivated angiosperms. *Plant J* **104**: 522–531
- 747 **Weinert N, Piceno Y, Ding GC, Meincke R, Heuer H, Berg G, Schloter M,**  
748 **Andersen G, Smalla K** (2011) PhyloChip hybridization uncovered an enormous  
749 bacterial diversity in the rhizosphere of different potato cultivars: Many common  
750 and few cultivar-dependent taxa. *FEMS Microbiol Ecol* **75**: 497–506
- 751 **Woźniak M, Gałazka A, Tyśkiewicz R, Jaroszuk-ściseł J** (2019) Endophytic bacteria  
752 potentially promote plant growth by synthesizing different metabolites and their  
753 phenotypic/physiological profiles in the biolog gen iii microplate™ test. *Int J Mol*  
754 *Sci.* doi: 10.3390/ijms20215283
- 755 **Yadav AN, Verma P, Kumar S, Kumar V, Kumar M, Kumari Sugitha TC, Singh**  
756 **BP, Saxena AK, Dhaliwal HS** (2018) Actinobacteria from Rhizosphere:  
757 Molecular Diversity, Distributions, and Potential Biotechnological Applications.  
758 *New Futur Dev Microb Biotechnol Bioeng Actinobacteria Divers Biotechnol Appl*  
759 13–41
- 760 **Yeoh YK, Paungfoo-Lonhienne C, Dennis PG, Robinson N, Ragan MA, Schmidt S,**  
761 **Hugenholtz P** (2016) The core root microbiome of sugarcanes cultivated under  
762 varying nitrogen fertilizer application. *Environ Microbiol* **18**: 1338–1351
- 763 **Zhang J, Kobert K, Flouri T, Stamatakis A** (2014) PEAR: A fast and accurate  
764 Illumina Paired-End reAd mergeR. *Bioinformatics* **30**: 614–620
- 765 **Zhang J, Liu YX, Zhang N, Hu B, Jin T, Xu H, Qin Y, Yan P, Zhang X, Guo X, et**  
766 **al** (2019) NRT1.1B is associated with root microbiota composition and nitrogen  
767 use in field-grown rice. *Nat Biotechnol* **37**: 676–684
- 768
- 769

770 **Table**

771 **Table 1. Permanova results for variation in root microbiomes**

|           | DF <sup>a</sup> | SS <sup>b</sup> | MSS <sup>c</sup> | F value <sup>d</sup> | R <sup>2</sup> | P value  |     |
|-----------|-----------------|-----------------|------------------|----------------------|----------------|----------|-----|
| G         | 8               | 4.0915          | 0.5114           | 4.2391               | 0.0436         | 1.00E-04 | *** |
| C         | 2               | 20.6411         | 10.3206          | 85.5426              | 0.2199         | 1.00E-04 | *** |
| E         | 1               | 20.5804         | 20.5804          | 170.5821             | 0.2193         | 1.00E-04 | *** |
| G × C     | 16              | 3.6375          | 0.2273           | 1.8844               | 0.0388         | 1.00E-04 | *** |
| G × E     | 8               | 3.9657          | 0.4957           | 4.1088               | 0.0423         | 1.00E-04 | *** |
| C × E     | 2               | 3.9470          | 1.9735           | 16.3576              | 0.0421         | 1.00E-04 | *** |
| G × C × E | 16              | 4.0601          | 0.2538           | 2.1033               | 0.0433         | 1.00E-04 | *** |
| Residuals | 273             | 32.9369         | 0.1206           |                      | 0.3509         |          |     |
| Total     | 326             | 93.8604         |                  |                      | 1              |          |     |

772 <sup>a</sup> Degree of freedom. <sup>b</sup> Sums of squares. <sup>c</sup> Mean sums of squares. <sup>d</sup> Pseudo-F value in  
773 permutation

774

775

776

777

778

779 **Table 2. Generalized linear model for plant phenotypes in the cross-inoculation**  
 780 **experiment without non-inoculant data.**

|                  |           | DF <sup>a</sup> | SS <sup>b</sup> | F value  | $\eta^2$ | P value  |     |
|------------------|-----------|-----------------|-----------------|----------|----------|----------|-----|
| SL <sup>c</sup>  | G         | 8               | 142.7981        | 89.5157  | 0.3334   | 3.52E-92 | *** |
|                  | C         | 2               | 2.6835          | 6.7287   | 0.0028   | 1.30E-03 | **  |
|                  | E         | 1               | 39.6516         | 198.8508 | 0.1448   | 2.24E-38 | *** |
|                  | G × C     | 16              | 13.0064         | 4.0767   | 0.0297   | 2.21E-07 | *** |
|                  | G × E     | 8               | 9.6809          | 6.0686   | 0.0495   | 1.79E-07 | *** |
|                  | C × E     | 2               | 0.6253          | 1.5678   | 0.0013   | 2.10E-01 |     |
|                  | G × C × E | 16              | 6.3997          | 2.0059   | 0.4329   | 1.14E-02 | *   |
|                  | Residuals | 511             | 101.8952        |          |          |          |     |
| RL <sup>d</sup>  | G         | 8               | 55.8287         | 45.0103  | 0.3037   | 1.34E-54 | *** |
|                  | C         | 2               | 7.7638          | 25.0375  | 0.0301   | 4.23E-11 | *** |
|                  | E         | 1               | 13.7103         | 88.4282  | 0.0528   | 1.77E-19 | *** |
|                  | G × C     | 16              | 12.4633         | 5.0241   | 0.0311   | 9.96E-10 | *** |
|                  | G × E     | 8               | 9.0006          | 7.2565   | 0.0612   | 3.85E-09 | *** |
|                  | C × E     | 2               | 5.3485          | 17.2484  | 0.0256   | 5.64E-08 | *** |
|                  | G × C × E | 16              | 7.8354          | 3.1586   | 0.4818   | 3.50E-05 | *** |
|                  | Residuals | 511             | 79.2275         |          |          |          |     |
| NOL <sup>e</sup> | G         | 8               | 66.5305         | 64.1591  | 0.2630   | 2.51E-72 | *** |
|                  | C         | 2               | 2.4078          | 9.2878   | 0.0039   | 1.09E-04 | *** |
|                  | E         | 1               | 34.9319         | 269.4944 | 0.2143   | 6.00E-49 | *** |
|                  | G × C     | 16              | 10.0314         | 4.8369   | 0.0311   | 2.92E-09 | *** |
|                  | G × E     | 8               | 5.5026          | 5.3065   | 0.0617   | 2.07E-06 | *** |
|                  | C × E     | 2               | 0.5684          | 2.1927   | 0.0028   | 1.13E-01 |     |
|                  | G × C × E | 16              | 4.3638          | 2.1041   | 0.4023   | 7.29E-03 | **  |
|                  | Residuals | 511             | 66.2358         |          |          |          |     |
| NOB <sup>f</sup> | G         | 8               | 5.5351          | 5.7189   | 0.0622   | 5.51E-07 | *** |
|                  | C         | 2               | 1.1457          | 4.7350   | 0.0064   | 9.17E-03 | **  |
|                  | E         | 1               | 22.9586         | 189.7658 | 0.1863   | 6.12E-37 | *** |
|                  | G × C     | 16              | 3.5567          | 1.8374   | 0.0251   | 2.41E-02 | *   |
|                  | G × E     | 8               | 7.3823          | 7.6274   | 0.0753   | 1.16E-09 | *** |
|                  | C × E     | 2               | 0.3147          | 1.3005   | 0.0030   | 2.73E-01 |     |
|                  | G × C × E | 16              | 3.4697          | 1.7925   | 0.4311   | 2.92E-02 | *   |
|                  | Residuals | 511             | 61.8228         |          |          |          |     |

781 <sup>a</sup> Degree of freedom. <sup>b</sup> Sums of squares.

782 <sup>c</sup> Shoot length. <sup>d</sup> Root length. <sup>e</sup> Number of leaves. <sup>f</sup> Number of branches.

783

784

785

786 **Figure legends**

787

788 **Figure 1. Family level composition of *Lotus* root microbiomes.**

789 A color-coded bar plot shows the bacterial family abundance in the *Lotus* root sample.

790 Sample names were given “Genotype”\_”Inoculant”\_” Environment”\_replicate in this

791 study. The upper and lower parts are shown with and without salt, respectively. The

792 grey portion of plots indicated the “NotAssigned” taxa. Arabic and Greek numerals

793 following the family name are based on the classification in RDP11.

794

795 **Figure 2.  $\alpha$ -diversities of root microbiomes.**

796  $\alpha$ -diversity based on the Shannon index with a strain-level taxonomic assignment. (A)

797 Distribution of  $\alpha$ -diversity in the *Lotus* root samples. (B, C, and D) Comparison of  $\alpha$ -

798 diversity among groups of host genotypes [G], inoculant communities [C], and

799 environments [E], respectively.

800

801 **Figure 3. Root microbiome structures based on  $\beta$ -diversity.**

802 Non-metric multidimensional scaling (nMDS) for *Lotus* root microbiome dissimilarity

803 (Morisita-Horn index) is shown. (A, B, and C) Colors represent different plant

804 genotypes, inoculants, and conditions.

805

806 **Figure 4. Plant phenotypic variation in the cross-inoculation experiments.**

807 Heatmaps of the four plant phenotypes: (A) shoot length, (B) root length, (C) number of

808 leaves, and (D) number of branches. Each cell color indicates standardized phenotypic

809 values for each plant genotype.

810

811 **Figure 5. Effect sizes of G, C, E, and their interactions on plant phenotypes.**

812 The portion of each color and number on the bar chart represent the effect size  $\eta^2$  of

813 each variable in the generalized linear model without non-inoculant data.

814

815

816

817



818 **Supplemental Figure legends**

819 **Supplemental Figure S1. Rarefaction curve.**

820 The rarefaction curve was derived from root microbiome data. The vertical axis  
821 represents the number of the strains. The horizontal axis represents the read count. Two  
822 clusters could be recognized from the sample size, which corresponded to the first and  
823 second runs of the MiSeq sequence.

824

825 **Supplemental Figure S2. Correlations between root microbiome structures and**  
826 **plant genetic distances.**

827 The vertical axis represents the root microbiome similarity based on the Morisita-Horn  
828 index. Prior to calculating diversity, the root microbiomes observed in each plant  
829 genotype with each inoculant-environment combination were averaged. The horizontal  
830 axis represents plant genetic similarity based on 1 – identical by state kinships among  
831 plant genotypes, based on Shah et al. (2020). Regression lines were drawn using ggplot  
832 with the *lm* function.

833

834 **Supplemental Figure S3. Effects of G, C, E, and their interactions on bacterial**  
835 **frequencies.**

836 The generalized linear model evaluated the effects of G, C, E, and their interactions on  
837 3,700 bacterial strains, and the distributions of their significance (P values) are shown as  
838 violin plots. Dashed lines indicate P values equal to 0.05.

839

840 **Supplemental Figure S4. Venn diagram showing how many bacteria are affected**  
841 **by G, C, and E and how much the effects overlap.**

842 Venn diagrams of the significant effects of G, C, and E and their interactions on  
843 bacterial frequencies. Each cell number represents the number of bacterial strains  
844 affected. (A) Comparison of sole effects of G, C, and C, (B) comparison of G-related  
845 effects, and (C) comparison of C- and E-related effects.

846

847 **Supplemental Figure S5. Correlation and distribution of phenotypes in plant**  
848 **genotypes [G].**

849 Violin plots and histograms show the distribution of phenotypic values. The x- and y-  
850 axes in each scatterplot represent the following phenotypic values: shoot length, root  
851 length, number of leaves, and number of branches. Pearson's correlation coefficients  
852 were calculated for all phenotypes (black indicates all groups).

853

854 **Supplemental Figure S6. Correlation and distribution of phenotypes in inoculants**  
855 **[C].**

856 Violin plots and histograms show the distribution of phenotypic values. The x- and y-  
857 axes in each scatterplot represent the following phenotypic values: shoot length, root  
858 length, number of leaves, and number of branches. Pearson's correlation coefficients  
859 were calculated for all phenotypes (black indicates all groups).

860

861 **Supplemental Figure S7. Correlation and distribution of phenotypes in**  
862 **environments [E].**

863 Violin plots and histograms show the distribution of phenotypic values. The x- and y-  
864 axes in each scatterplot represent the following phenotypic values: shoot length, root  
865 length, number of leaves, and number of branches. Pearson's correlation coefficients  
866 were calculated for all phenotypes (black indicates all groups).

867

868 **Supplemental Figure S8. Quantile-quantile plots for phenotypes of the cross-**  
869 **inoculation experiment to visualize the fits with the Gamma distribution.**

870 The shaded region represents 95% confidence intervals. (A) Shoot length, (B) root  
871 length, (C) number of leaves, and (D) number of branches.

872

873 **Supplemental Figure S9. Quantile-quantile plots for phenotypes of the cross-**  
874 **inoculation experiment, except for non-inoculant data, to visualize the fits with the**  
875 **Gamma distribution.**

876 The shaded region represents 95% confidence intervals. (A) Shoot length, (B) root  
877 length, (C) number of leaves, and (D) number of branches.

878

879 **Supplemental Figure S10. The significant effects of G, C, E, and their interactions**  
880 **on plant phenotypes in the randomized test to assess the pot effects in our cross-**  
881 **inoculation experiments.**

882 The vertical axis represents the log<sub>10</sub> P-values for each effect. Dashed lines indicate P  
883 values of 0.05. (A) Shoot length, (B) root length, (C) number of leaves, and (D) number  
884 of branches.

885

886 **Supplemental Figure S11. Effects of G, C, E, and their interactions on plant**  
887 **phenotypes in the randomized test to assess the pot effects in our cross-inoculation**  
888 **experiments.**

889 The vertical axis represents the  $\eta^2$  values for each effect. (A) Shoot length, (B) root

890 length, (C) number of leaves, and (D) number of branches.

891

892 **Supplemental Figure S12. Root microbiome structure based on  $\beta$ -diversity in each**  
893 **inoculant-condition combination.**

894 Non-metric multidimensional scaling (NMDS) for *Lotus* root microbiome dissimilarity  
895 (Morisita-Horn index) is shown. nMDS for the *Lotus* root microbiome for each  
896 inoculant-condition combination. The color represents different plant genotypes, and the  
897 areas of the identical genotypes are encompassed.

898

899 **Supplemental Figure S13. Sensitive genera to plant genotype and their correlation**  
900 **in the genus.**

901 The horizontal axes represent Spearman's rank correlation coefficient, R, between the  
902 two bacterial strains significantly affected by plant genotype-related effects. The  
903 vertical axes represent the frequencies of the bacterial strain pairs. (A and B)  
904 *Pseudomonas* and *Sphingobium* were sensitive to the G effect. (C) *Ralstonia* is sensitive  
905 to  $G \times C$  effects. (D) *Delftia* is sensitive to  $G \times C \times E$ .

906

907 **Supplemental Figure S14. Sensitive genera to plant genotype-related effects and**  
908 **their distributions in the root microbiome.**

909 The horizontal axes represent bacterial strains belonging to each genus. The vertical  
910 axes represent (A, B) plant genotype, (C) genotype  $\times$  inoculant, and (D) genotype  $\times$   
911 inoculant  $\times$  environmental combinations. Each cell color indicates the average bacterial  
912 frequency standardized for each bacterial strain.

913

914

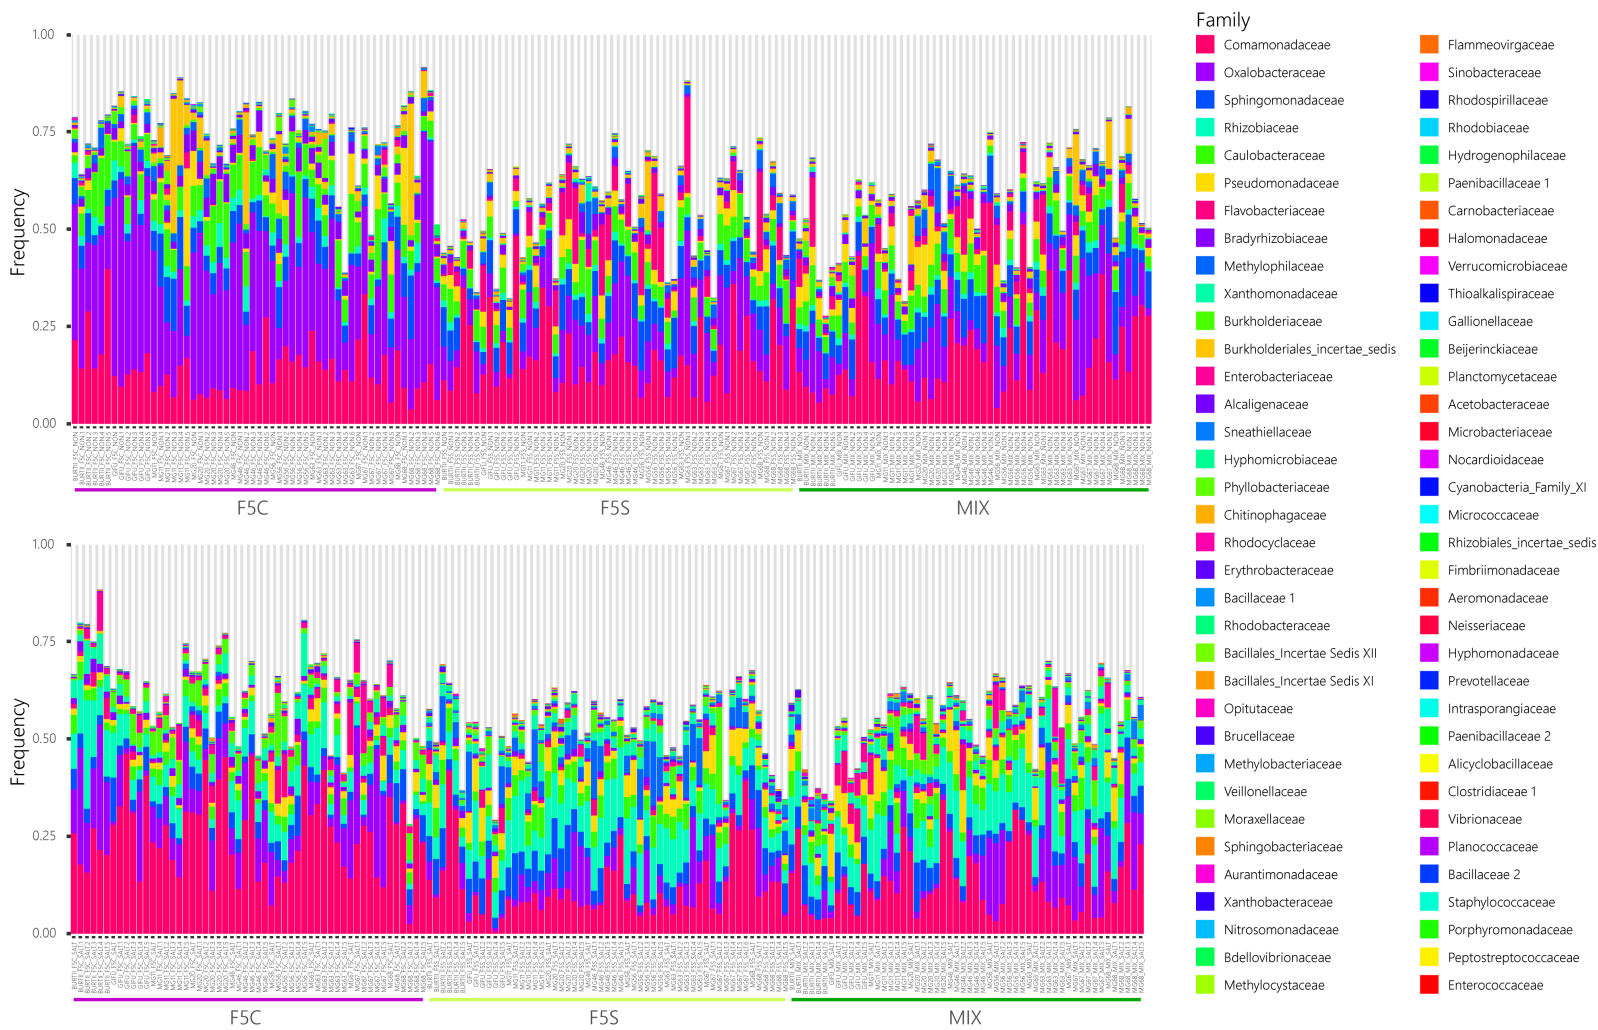

**Figure 1. Family level composition of *Lotus* root microbiomes.**

A color-coded bar plot shows the bacterial family abundance in the *Lotus* root sample. Sample names were given “Genotype”\_”Inoculant”\_” Environment”\_replicate in this study. The upper and lower parts are shown with and without salt, respectively. The grey portion of plots indicated the “NotAssigned” taxa. Arabic and Greek numerals following the family name are based on the classification in RDP11.

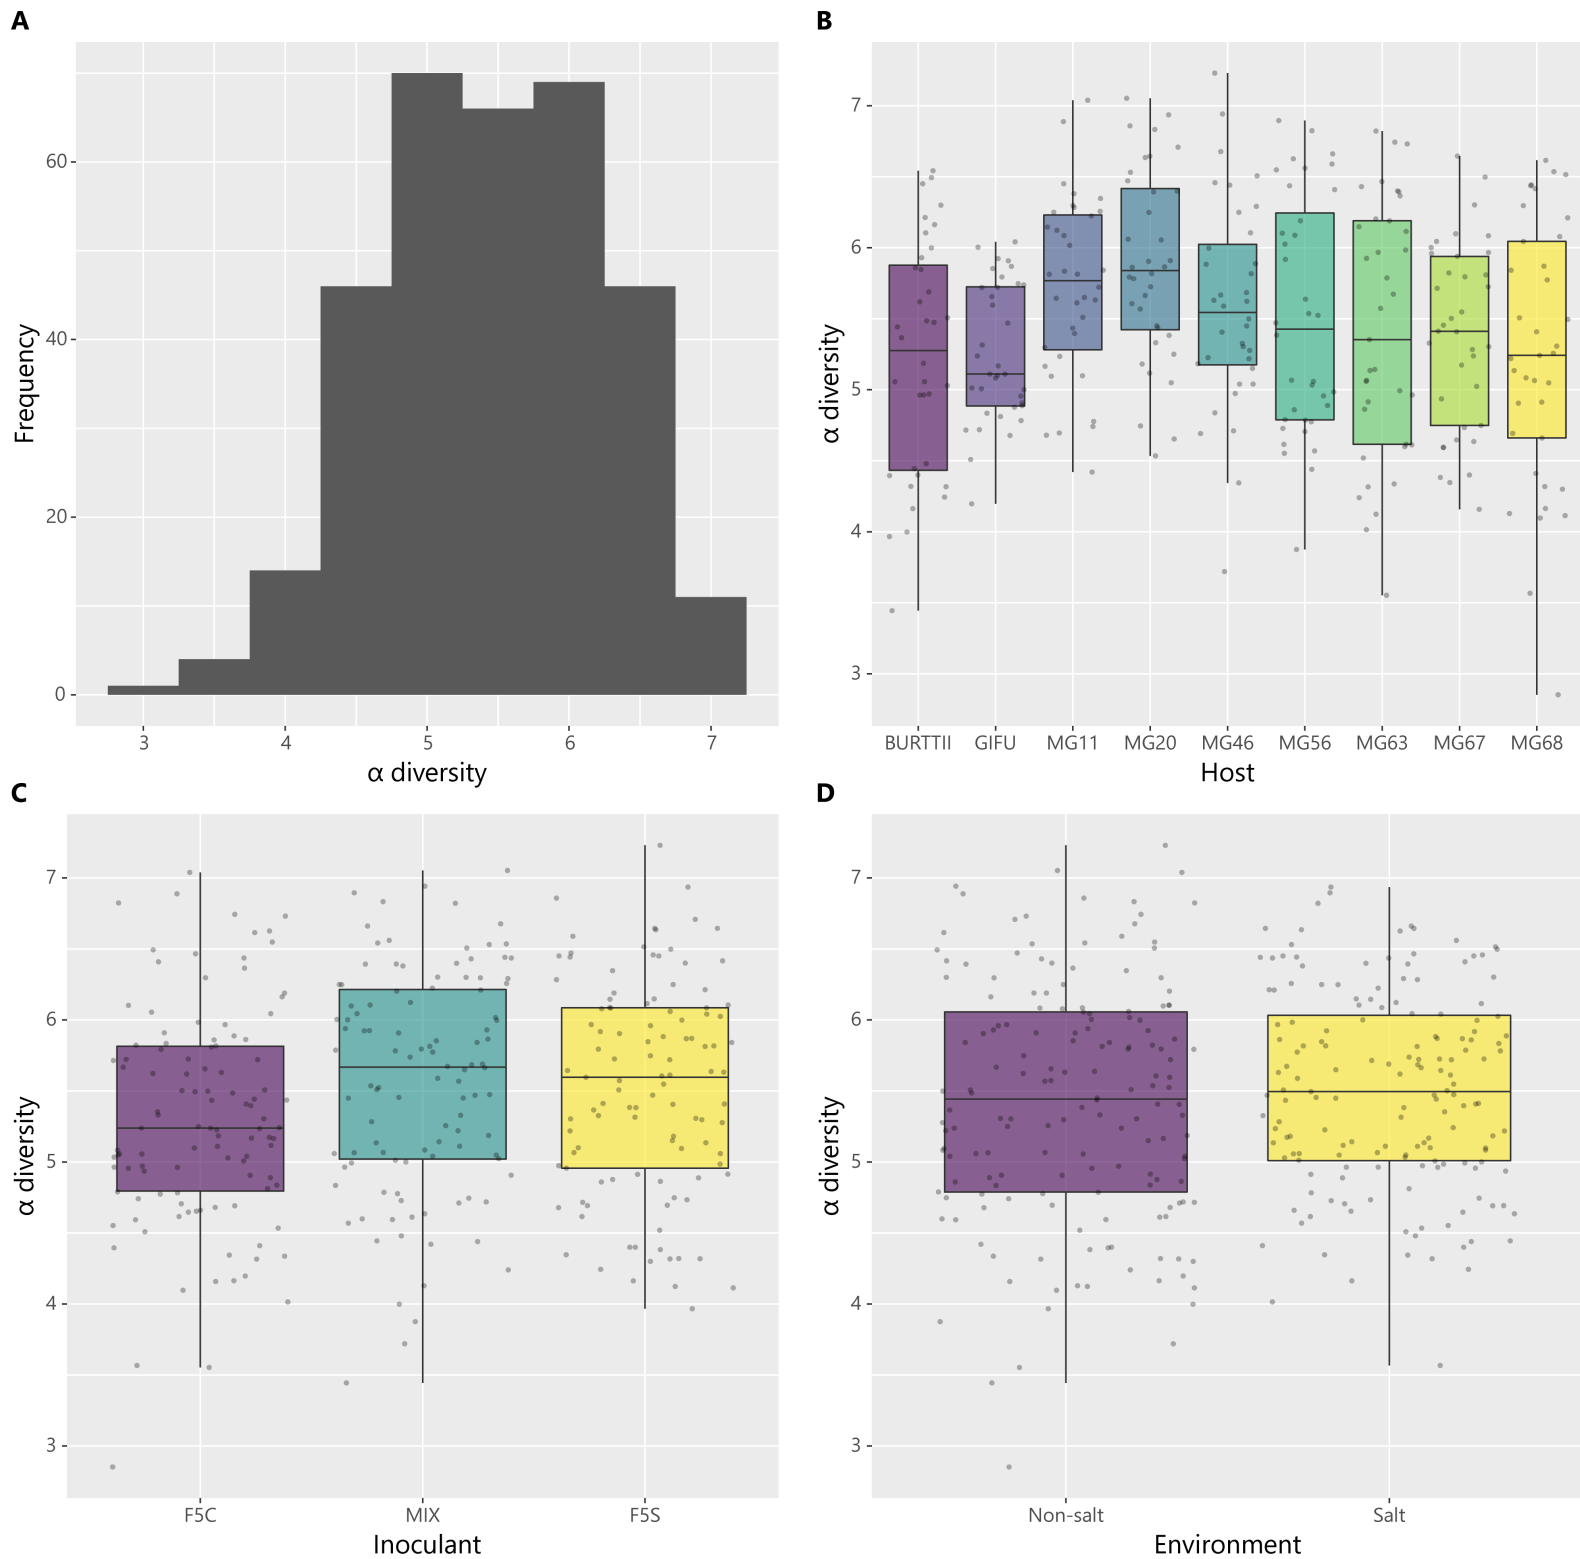

**Figure 2.  $\alpha$ -diversities of root microbiomes.**

$\alpha$ -diversity based on the Shannon index with a strain-level taxonomic assignment. (A) Distribution of  $\alpha$ -diversity in the *Lotus* root samples. (B, C, and D) Comparison of  $\alpha$ -diversity among groups of host genotypes [G], inoculant communities [C], and environments [E], respectively.

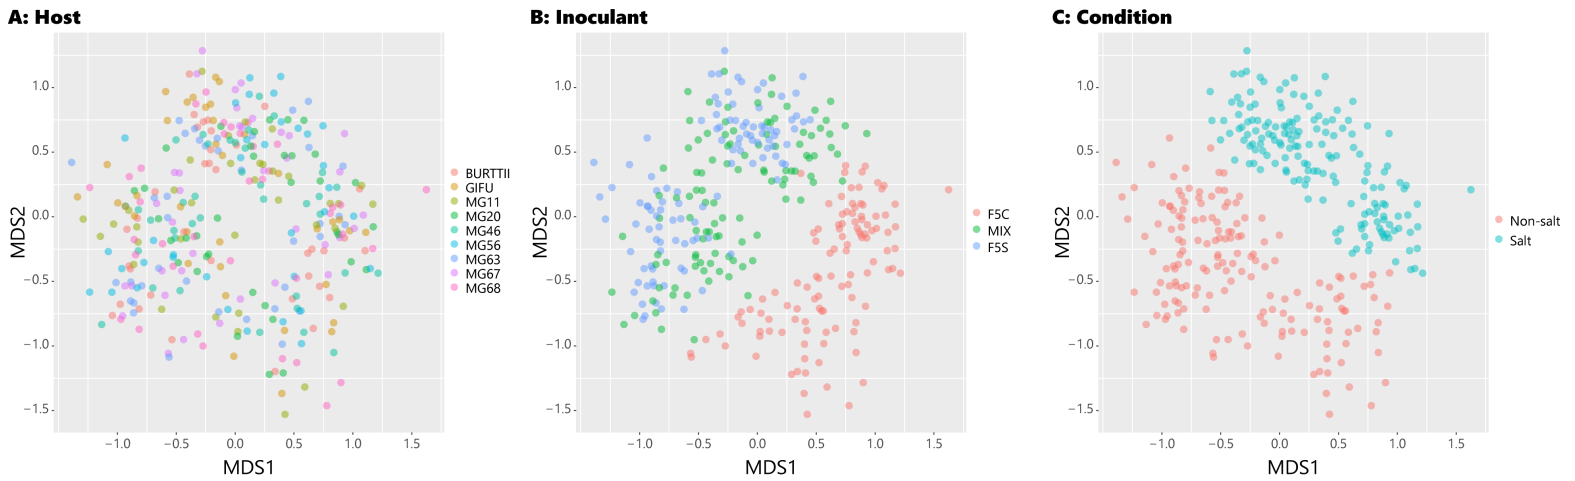

**Figure 3. Root microbiome structures based on  $\beta$ -diversity.**

Non-metric multidimensional scaling (nMDS) for *Lotus* root microbiome dissimilarity (Morisita-Horn index) is shown. (A, B, and C) Colors represent different plant genotypes, inoculants, and conditions.

**A : Shoot length**

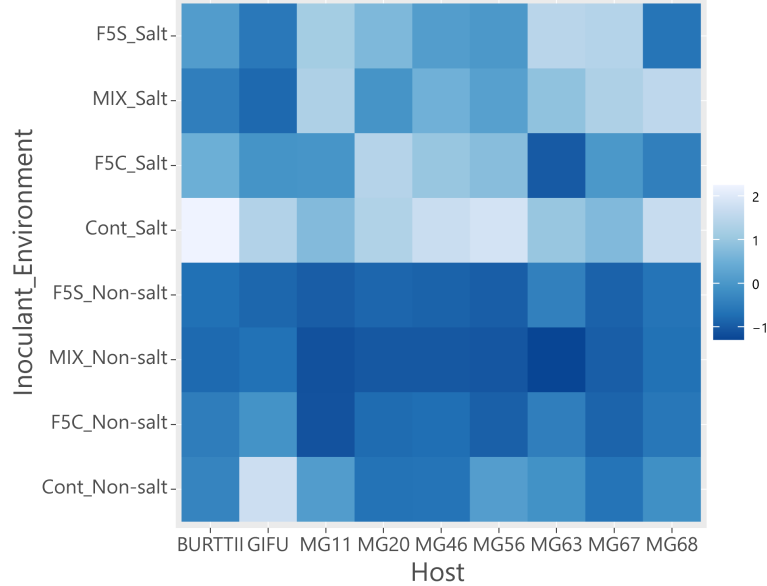

**B : Root length**

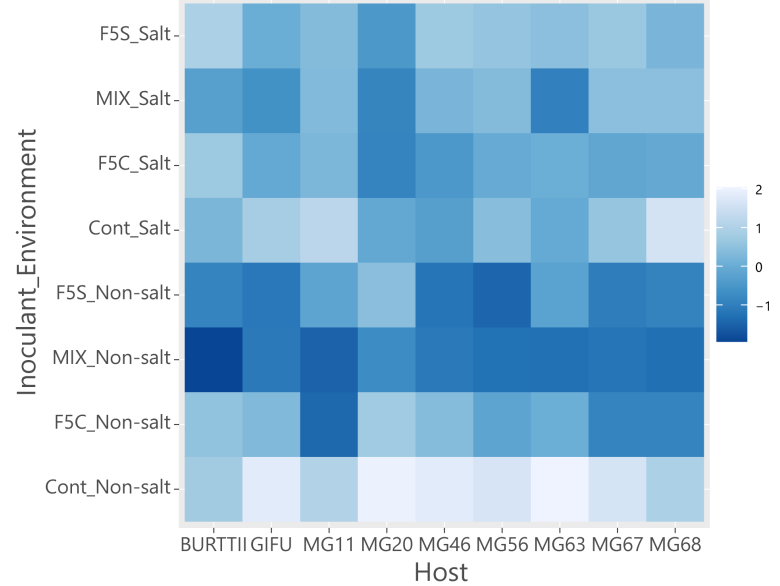

**C : Number of leaves**

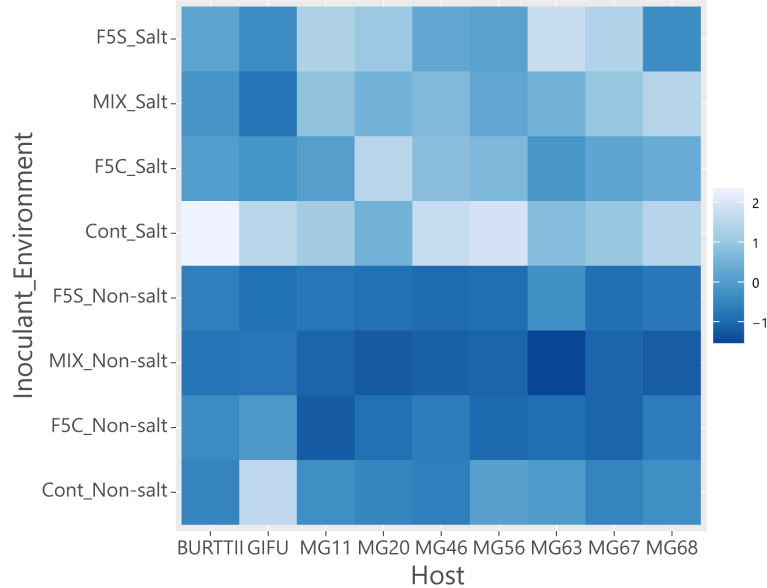

**D : Number of branches**

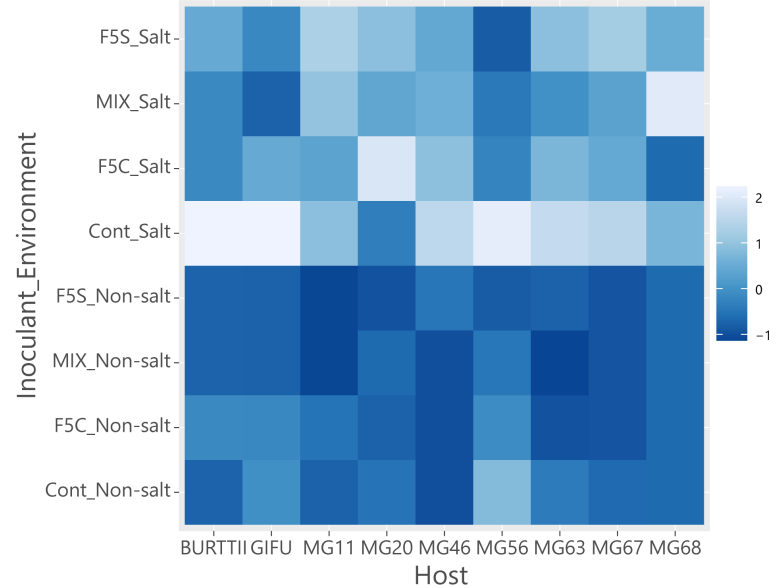

**Figure 4. Plant phenotypic variation in the cross-inoculation experiments.**

Heatmaps of the four plant phenotypes: (A) shoot length, (B) root length, (C) number of leaves, and (D) number of branches. Each cell color indicates standardized phenotypic values for each plant genotype.

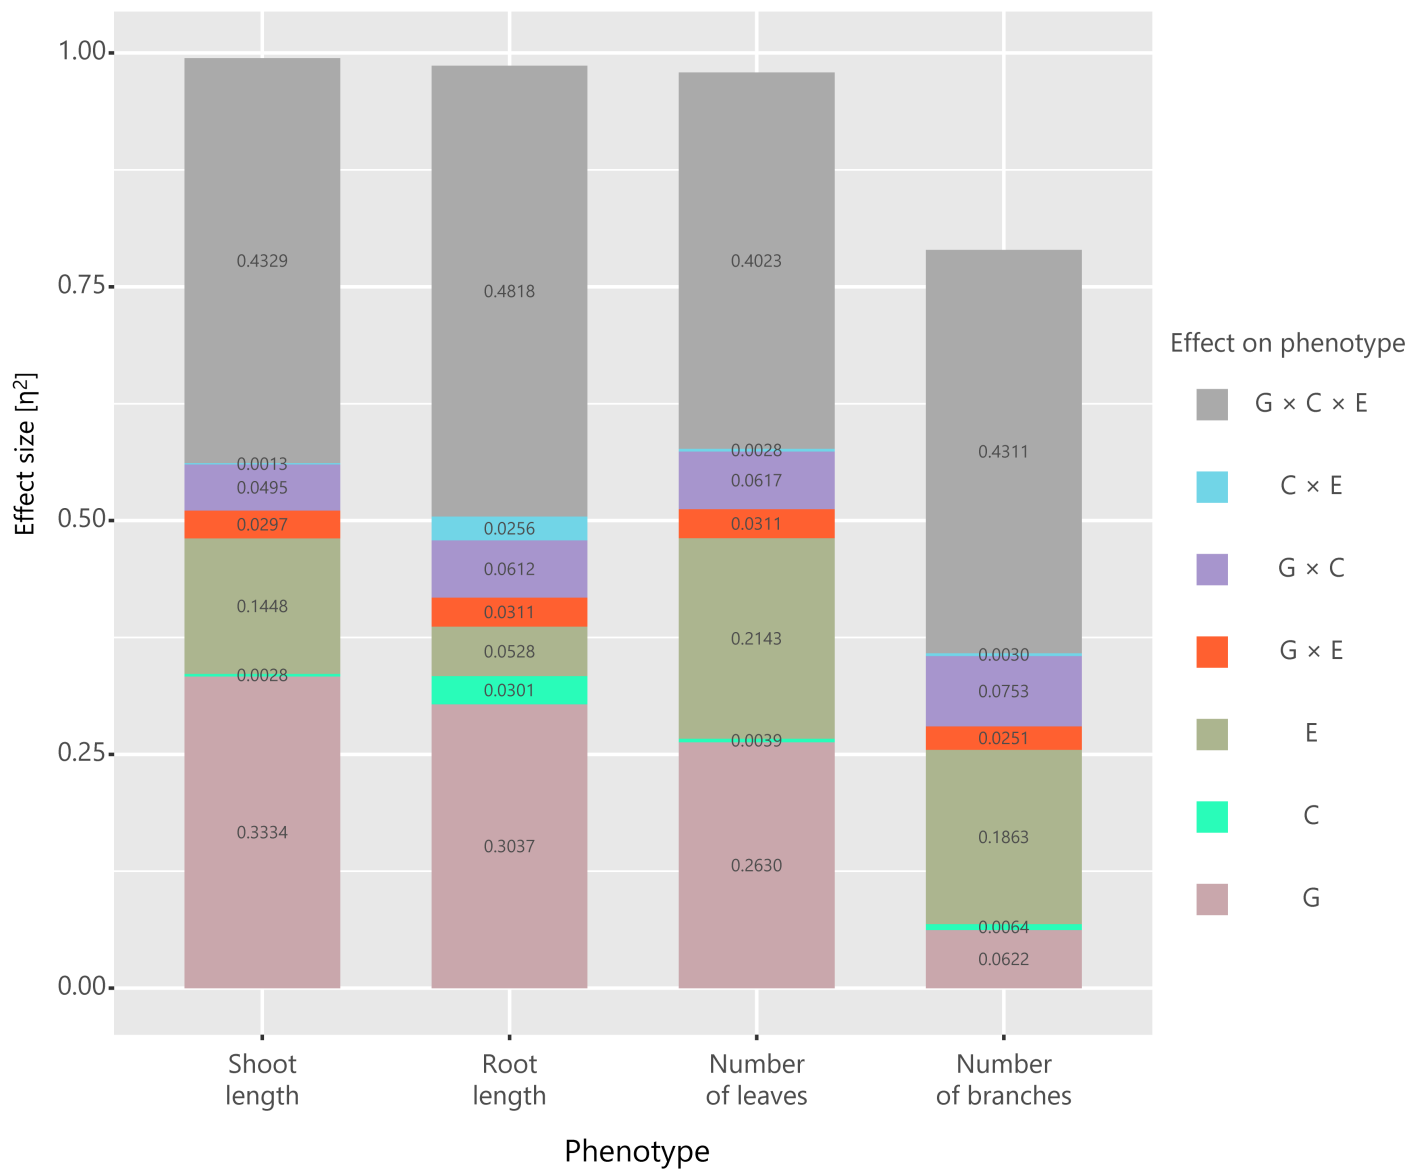

**Figure 5. Effect sizes of G, C, E, and their interactions on plant phenotypes.**

The portion of each color and number on the bar chart represent the effect size  $\eta^2$  of each variable in the generalized linear model without non-inoculant data.



## Parsed Citations

- Alegria Terrazas R, Balbirnie-Cumming K, Morris J, Hedley PE, Russell J, Paterson E, Baggs EM, Fridman E, Bulgarelli D (2020) A footprint of plant eco-geographic adaptation on the composition of the barley rhizosphere bacterial microbiota. *Sci Rep* 10: 1–13**  
Google Scholar: [Author Only](#) [Title Only](#) [Author and Title](#)
- Álvarez B, López MM, Biosca EG (2019) Biocontrol of the Major Plant Pathogen *Ralstonia solanacearum* in Irrigation Water and Host Plants by Novel Waterborne Lytic Bacteriophages. *Front Microbiol* 10: 1–17**  
Google Scholar: [Author Only](#) [Title Only](#) [Author and Title](#)
- Bamba M, Aoki S, Kajita T, Setoguchi H, Watano Y, Sato S, Tsuchimatsu T (2019) Exploring genetic diversity and signatures of horizontal gene transfer in nodule bacteria associated with *Lotus japonicus* in natural environments. *Mol Plant-Microbe Interact*. doi: 10.1094/MPMI-02-19-0039-R**  
Google Scholar: [Author Only](#) [Title Only](#) [Author and Title](#)
- Bamba M, Aoki S, Kajita T, Setoguchi H, Watano Y, Sato S, Tsuchimatsu T (2020) Massive rhizobial genomic variation associated with partner quality in *Lotus*–*Mesorhizobium* symbiosis. *FEMS Microbiol Ecol* 1–15**  
Google Scholar: [Author Only](#) [Title Only](#) [Author and Title](#)
- Bamba M, Kawaguchi YW, Tsuchimatsu T (2018) Plant adaptation and speciation studied by population genomic approaches. *Dev Growth, Differ* 61: 12–24**  
Google Scholar: [Author Only](#) [Title Only](#) [Author and Title](#)
- Berendsen RL, Pieterse CMJ, Bakker PAHM (2012) The rhizosphere microbiome and plant health. *Trends Plant Sci* 17: 478–486**  
Google Scholar: [Author Only](#) [Title Only](#) [Author and Title](#)
- Bouffaud ML, Poirier MA, Muller D, Moëgne-Loccoz Y (2014) Root microbiome relates to plant host evolution in maize and other Poaceae. *Environ Microbiol* 16: 2804–2814**  
Google Scholar: [Author Only](#) [Title Only](#) [Author and Title](#)
- Bouskill NJ, Lim HC, Borglin S, Salve R, Wood TE, Silver WL, Brodie EL (2013) Pre-exposure to drought increases the resistance of tropical forest soil bacterial communities to extended drought. *ISME J* 7: 384–394**  
Google Scholar: [Author Only](#) [Title Only](#) [Author and Title](#)
- Broughton WJ, Dilworth MJ (1971) Control of leghaemoglobin synthesis in snake beans. *Biochem J* 125: 1075–1080**  
Google Scholar: [Author Only](#) [Title Only](#) [Author and Title](#)
- Brown SP, Grillo MA, Podowski JC, Heath KD (2021) Correction to: Soil origin and plant genotype structure distinct microbiome compartments in the model legume *Medicago truncatula* (*Microbiome*, (2020), 8, 1, (139), 10.1186/s40168-020-00915-9). *Microbiome* 9: 1–17**  
Google Scholar: [Author Only](#) [Title Only](#) [Author and Title](#)
- Bulgarelli D, Rott M, Schlaeppi K, Ver Loren van Themaat E, Ahmadinejad N, Assenza F, Rauf P, Huettel B, Reinhardt R, Schmelzer E, et al (2012) Revealing structure and assembly cues for *Arabidopsis* root-inhabiting bacterial microbiota. *Nature* 488: 91–95**  
Google Scholar: [Author Only](#) [Title Only](#) [Author and Title](#)
- Busby PE, Peay KG, Newcombe G (2016) Common foliar fungi of *Populus trichocarpa* modify *Melampsora* rust disease severity. *New Phytol* 209: 1681–1692**  
Google Scholar: [Author Only](#) [Title Only](#) [Author and Title](#)
- Camacho C, Coulouris G, Avagyan V, Ma N, Papadopoulos J, Bealer K, Madden TL (2009) BLAST+: Architecture and applications. *BMC Bioinformatics* 10: 1–9**  
Google Scholar: [Author Only](#) [Title Only](#) [Author and Title](#)
- Carrión VJ, Perez-Jaramillo J, Cordovez V, Tracanna V, De Hollander M, Ruiz-Buck D, Mendes LW, van Ijcken WFJ, Gomez-Exposito R, Elsayed SS, et al (2019) Pathogen-induced activation of disease-suppressive functions in the endophytic root microbiome. *Science* (80- ) 366: 606–612**  
Google Scholar: [Author Only](#) [Title Only](#) [Author and Title](#)
- Chao A, Jost L (2012) Coverage-based rarefaction and extrapolation: Standardizing samples by completeness rather than size. *Ecology* 93: 2533–2547**  
Google Scholar: [Author Only](#) [Title Only](#) [Author and Title](#)
- Chelius MK, Triplett EW (2001) The diversity of archaea and bacteria in association with the roots of *Zea mays* L. *Microb Ecol* 41: 252–263**  
Google Scholar: [Author Only](#) [Title Only](#) [Author and Title](#)
- Cole JR, Wang Q, Fish JA, Chai B, McGarrell DM, Sun Y, Brown CT, Porras-Alfaro A, Kuske CR, Tiedje JM (2014) Ribosomal Database Project: Data and tools for high throughput rRNA analysis. *Nucleic Acids Res* 42: 633–642**

Google Scholar: [Author Only](#) [Title Only](#) [Author and Title](#)

de Vries FT, Williams A, Stringer F, Willcocks R, McEwing R, Langridge H, Straathof AL (2019) Changes in root-exudate-induced respiration reveal a novel mechanism through which drought affects ecosystem carbon cycling. *New Phytol* 224: 132–145

Google Scholar: [Author Only](#) [Title Only](#) [Author and Title](#)

Enebe MC, Babalola OO (2020) Effects of inorganic and organic treatments on the microbial community of maize rhizosphere by a shotgun metagenomics approach. *Ann Microbiol*. doi: 10.1186/s13213-020-01591-8

Google Scholar: [Author Only](#) [Title Only](#) [Author and Title](#)

Fields B, Moeskjær S, Friman VP, Andersen SU, Young JPW (2021) MAUI-seq: Metabarcoding using amplicons with unique molecular identifiers to improve error correction. *Mol Ecol Resour* 21: 703–720

Google Scholar: [Author Only](#) [Title Only](#) [Author and Title](#)

Finkel OM, Castrillo G, Herrera Paredes S, Salas González I, Dangl JL (2017) Understanding and exploiting plant beneficial microbes. *Curr Opin Plant Biol* 38: 155–163

Google Scholar: [Author Only](#) [Title Only](#) [Author and Title](#)

Fox J, Weisberg S (2019) *An R Companion to Applied Regression*, Third edit. Sage, Thousand Oaks

Google Scholar: [Author Only](#) [Title Only](#) [Author and Title](#)

Gallart M, Adair KL, Love J, Meason DF, Clinton PW, Xue J, Turnbull MH (2018) Host Genotype and Nitrogen Form Shape the Root Microbiome of *Pinus radiata*. *Microb Ecol* 75: 419–433

Google Scholar: [Author Only](#) [Title Only](#) [Author and Title](#)

Guo J, Ni BJ, Han X, Chen X, Bond P, Peng Y, Yuan Z (2017) Unraveling microbial structure and diversity of activated sludge in a full-scale simultaneous nitrogen and phosphorus removal plant using metagenomic sequencing. *Enzyme Microb Technol* 102: 16–25

Google Scholar: [Author Only](#) [Title Only](#) [Author and Title](#)

Handberg K, Stougaard J (1992) *Lotus japonicus*, an autogamous, diploid legume species for classical and molecular genetics. *Plant J* 2: 487–496

Google Scholar: [Author Only](#) [Title Only](#) [Author and Title](#)

Horn HS (1966) *Measurement of "Overlap" in Comparative Ecological Studies*. The University of Chicago Press for The American Society of Naturalists. <http://www.jstor.com/stable/2459242> *ECOLOGICAL STUDIES*. 100: 419–424

Google Scholar: [Author Only](#) [Title Only](#) [Author and Title](#)

Hothorn T, Bretz F, Westfall P (2008) Simultaneous inference in general parametric models. *Biometrical J* 50: 346–363

Google Scholar: [Author Only](#) [Title Only](#) [Author and Title](#)

Innerebner G, Knief C, Vorholt JA (2011) Protection of *Arabidopsis thaliana* against leaf-pathogenic *Pseudomonas syringae* by *Sphingomonas* strains in a controlled model system. *Appl Environ Microbiol* 77: 3202–3210

Google Scholar: [Author Only](#) [Title Only](#) [Author and Title](#)

Jain A, Das S (2016) Insight into the Interaction between Plants and Associated Fluorescent *Pseudomonas* spp. *Int J Agron*. doi: 10.1155/2016/4269010

Google Scholar: [Author Only](#) [Title Only](#) [Author and Title](#)

Kamal N, Mun T, Reid D, Lin JS, Akyol TY, Sandal N, Asp T, Hirakawa H, Stougaard J, Mayer KFX, et al (2020) Insights into the evolution of symbiosis gene copy number and distribution from a chromosome-scale *Lotus japonicus* Gifu genome sequence. *DNA Res* 27: 1–10

Google Scholar: [Author Only](#) [Title Only](#) [Author and Title](#)

Kawaguchi M (2000) *Lotus japonicus* "Miyakojima" MG-20: An early-flowering accession suitable for indoor handling. *J Plant Res* 113: 507–509

Google Scholar: [Author Only](#) [Title Only](#) [Author and Title](#)

Kawaguchi M, Pedrosa-Harand A, Yano K, Hayashi M, Murooka Y, Saito K, Nagata T, Namai K, Nishida H, Shibata D, et al (2005) *Lotus burtii* takes a position of the third corner in the *Lotus* molecular genetics triangle. *DNA Res* 12: 69–77

Google Scholar: [Author Only](#) [Title Only](#) [Author and Title](#)

Liu H, Brettell LE, Qiu Z, Singh BK (2020) Microbiome-Mediated Stress Resistance in Plants. *Trends Plant Sci* 25: 733–743

Google Scholar: [Author Only](#) [Title Only](#) [Author and Title](#)

Lundberg DS, Lebeis SL, Paredes SH, Yourstone S, Gehring J, Malfatti S, Tremblay J, Engelbrektsen A, Kunin V, Rio TG Del, et al (2012) Defining the core *Arabidopsis thaliana* root microbiome. *Nature* 488: 86–90

Google Scholar: [Author Only](#) [Title Only](#) [Author and Title](#)

**Mauchline TH, Malone JG (2017) Life in earth – the root microbiome to the rescue? *Curr Opin Microbiol* 37: 23–28**

Naylor D, Degraaf S, Purdom E, Coleman-Derr D (2017) Drought and host selection influence bacterial community dynamics in the grass root microbiome. *ISME J* 11: 2691–2704

Google Scholar: [Author Only](#) [Title Only](#) [Author and Title](#)

Oksanen J, Blanchet FG, Friendly M, Kindt R, Legendre P, McGlenn D, Minchin PR, O'Hara RB, Simpson GL, Solymos P, et al **Vegan: Community Ecology Package. Version 2.5- 7.** <https://cran.r-project.org/web/packages/vegan/index.html>

Paradis E, Schliep K (2019) Ape 5.0: An environment for modern phylogenetics and evolutionary analyses in R. *Bioinformatics* 35: 526–528

Google Scholar: [Author Only](#) [Title Only](#) [Author and Title](#)

Parte AC, Carbasse JS, Meier-Kolthoff JP, Reimer LC, Göker M (2020) List of prokaryotic names with standing in nomenclature (LPSN) moves to the DSMZ. *Int J Syst Evol Microbiol* 70: 5607–5612

Google Scholar: [Author Only](#) [Title Only](#) [Author and Title](#)

Peiffer JA, Spor A, Koren O, Jin Z, Tringe SG, Dangl JL, Buckler ES, Ley RE (2013) Diversity and heritability of the maize rhizosphere microbiome under field conditions. *Proc Natl Acad Sci* 110: 6548–6553

Google Scholar: [Author Only](#) [Title Only](#) [Author and Title](#)

Pfeiffer S, Mitter B, Oswald A, Schloter-Hai B, Schloter M, Declerck S, Sessitsch A (2017) Rhizosphere microbiomes of potato cultivated in the high andes show stable and dynamic core microbiomes with different responses to plant development. *FEMS Microbiol Ecol* 93: 1–12

Google Scholar: [Author Only](#) [Title Only](#) [Author and Title](#)

Rushworth CA, Song BH, Lee CR, Mitchell-Olds T (2011) *Boechera*, a model system for ecological genomics. *Mol Ecol* 20: 4843–4857

Google Scholar: [Author Only](#) [Title Only](#) [Author and Title](#)

Santhanam R, Luu VT, Weinhold A, Goldberg J, Oh Y, Baldwin IT (2015) Native root-associated bacteria rescue a plant from a sudden-wilt disease that emerged during continuous cropping. *Proc Natl Acad Sci U S A* 112: E5013–E5120

Google Scholar: [Author Only](#) [Title Only](#) [Author and Title](#)

Schlaeppli K, Dombrowski N, Oter RG, Ver Loren Van Themaat E, Schulze-Lefert P (2014) Quantitative divergence of the bacterial root microbiota in *Arabidopsis thaliana* relatives. *Proc Natl Acad Sci U S A* 111: 585–592

Google Scholar: [Author Only](#) [Title Only](#) [Author and Title](#)

Shah N, Wakabayashi T, Kawamura Y, Skovbjerg CK, Wang M-Z, Mustamin Y, Isomura Y, Gupta V, Jin H, Mun T, et al (2020) Extreme genetic signatures of local adaptation during *Lotus japonicus* colonization. *Nat Commun*. doi: 10.1038/s41467-019-14213-y |

Google Scholar: [Author Only](#) [Title Only](#) [Author and Title](#)

Shannon, C.E., Weaver W (1949) *The mathematical theory of communication*. Univ. Illinois Press 29:

Google Scholar: [Author Only](#) [Title Only](#) [Author and Title](#)

Suchan DM, Bergsveinson J, Manzon L, Pierce A, Kryachko Y, Korber D, Tan Y, Tambalo DD, Khan NH, Whiting M, et al (2020) Transcriptomics reveal core activities of the plant growthpromoting bacterium *delftia acidovorans* RAY209 during interaction with canola and soybean roots. *Microb Genomics* 6: 1–13

Google Scholar: [Author Only](#) [Title Only](#) [Author and Title](#)

**Team RC (2019) R: A language and environment for statistical computing.**

Trujillo ME (2016) *Actinobacteria*. eLS. doi: 10.1002/9780470015902.a0020366.pub2

Google Scholar: [Author Only](#) [Title Only](#) [Author and Title](#)

Vishwakarma K, Kumar N, Shandilya C, Mohapatra S, Bhayana S, Varma A (2020) Revisiting Plant–Microbe Interactions and Microbial Consortia Application for Enhancing Sustainable Agriculture: A Review. *Front Microbiol* 11: 1–21

Google Scholar: [Author Only](#) [Title Only](#) [Author and Title](#)

Wagner MR, Lundberg DS, Del Rio TG, Tringe SG, Dangl JL, Mitchell-Olds T (2016) Host genotype and age shape the leaf and root microbiomes of a wild perennial plant. *Nat Commun* 7: 1–15

Google Scholar: [Author Only](#) [Title Only](#) [Author and Title](#)

Walters WA, Jin Z, Youngblut N, Wallace JG, Sutter J, Zhang W, González-Peña A, Peiffer J, Koren O, Shi Q, et al (2018) Large-scale replicated field study of maize rhizosphere identifies heritable microbes. *Proc Natl Acad Sci* 115: 7368–7373

Google Scholar: [Author Only](#) [Title Only](#) [Author and Title](#)

Wang B, Sugiyama S (2020) Phylogenetic signal of host plants in the bacterial and fungal root microbiomes of cultivated angiosperms. *Plant J* 104: 522–531

Google Scholar: [Author Only](#) [Title Only](#) [Author and Title](#)

Weinert N, Piceno Y, Ding GC, Meincke R, Heuer H, Berg G, Schloter M, Andersen G, Smalla K (2011) PhyloChip hybridization

uncovered an enormous bacterial diversity in the rhizosphere of different potato cultivars: Many common and few cultivar-dependent taxa. *FEMS Microbiol Ecol* 75: 497–506

Google Scholar: [Author Only](#) [Title Only](#) [Author and Title](#)

Woźniak M, Gałazka A, Tyśkiewicz R, Jaroszuć-Ścisiel J (2019) Endophytic bacteria potentially promote plant growth by synthesizing different metabolites and their phenotypic/physiological profiles in the biolog gen iii microplate™ test. *Int J Mol Sci*. doi: 10.3390/ijms20215283

Google Scholar: [Author Only](#) [Title Only](#) [Author and Title](#)

Yadav AN, Verma P, Kumar S, Kumar V, Kumar M, Kumari Sugitha TC, Singh BP, Saxena AK, Dhaliwal HS (2018) Actinobacteria from Rhizosphere: Molecular Diversity, Distributions, and Potential Biotechnological Applications. *New Futur Dev Microb Biotechnol Bioeng Actinobacteria Divers Biotechnol Appl* 13–41

Google Scholar: [Author Only](#) [Title Only](#) [Author and Title](#)

Yeoh YK, Paungfoo-Lonhienne C, Dennis PG, Robinson N, Ragan MA, Schmidt S, Hugenholtz P (2016) The core root microbiome of sugarcane cultivated under varying nitrogen fertilizer application. *Environ Microbiol* 18: 1338–1351

Google Scholar: [Author Only](#) [Title Only](#) [Author and Title](#)

Zhang J, Kobert K, Flouri T, Stamatakis A (2014) PEAR: A fast and accurate Illumina Paired-End reAd mergeR. *Bioinformatics* 30: 614–620

Google Scholar: [Author Only](#) [Title Only](#) [Author and Title](#)

Zhang J, Liu YX, Zhang N, Hu B, Jin T, Xu H, Qin Y, Yan P, Zhang X, Guo X, et al (2019) NRT1.1B is associated with root microbiota composition and nitrogen use in field-grown rice. *Nat Biotechnol* 37: 676–684

Google Scholar: [Author Only](#) [Title Only](#) [Author and Title](#)
